# Supplementary material for: Qualitative study of patient views on a ‘telephone-first’ approach in general practice in England: speaking to the GP by telephone before making face-to-face appointments
Source: PubMed Central journal article supplement (PMC6318515; doi:10.1136/bmjopen-2018-026197), 2018-12-31
Supplement: bmjopen-2018-026197.draft_revisions.pdf [file bmjopen-2018-026197.draft_revisions.pdf]

# BMJ Open

BMJ Open is committed to open peer review. As part of this commitment we make the peer review history of every article we publish publicly available.

When an article is published we post the peer reviewers' comments and the authors' responses online. We also post the versions of the paper that were used during peer review. These are the versions that the peer review comments apply to.

The versions of the paper that follow are the versions that were submitted during the peer review process. They are not the versions of record or the final published versions. They should not be cited or distributed as the published version of this manuscript.

BMJ Open is an open access journal and the full, final, typeset and author-corrected version of record of the manuscript is available on our site with no access controls, subscription charges or pay-per-view fees (<http://bmjopen.bmj.com>).

If you have any questions on BMJ Open's open peer review process please email [info.bmjopen@bmj.com](mailto:info.bmjopen@bmj.com)

# BMJ Open

## **A qualitative study of patient views on a 'telephone-first' approach in general practice: speaking to the GP by telephone before making face-to-face appointments**

|                               |                                                                                                                                                                                                                                                                                                                                    |
|-------------------------------|------------------------------------------------------------------------------------------------------------------------------------------------------------------------------------------------------------------------------------------------------------------------------------------------------------------------------------|
| Journal:                      | <i>BMJ Open</i>                                                                                                                                                                                                                                                                                                                    |
| Manuscript ID                 | bmjopen-2018-026197                                                                                                                                                                                                                                                                                                                |
| Article Type:                 | Research                                                                                                                                                                                                                                                                                                                           |
| Date Submitted by the Author: | 21-Aug-2018                                                                                                                                                                                                                                                                                                                        |
| Complete List of Authors:     | Ball, Sarah L.; RAND Europe, Cambridge Centre for Health Services Research<br>Newbould, Jennifer ; RAND Europe<br>Corbett, Jennie; RAND Europe<br>Exley, Josephine; London School of Hygiene and Tropical Medicine<br>Pitchforth, Emma; RAND Europe,<br>Roland, Martin; University of Cambridge, GP and Primary Care Research Unit |
| Keywords:                     | General practice, Remote consultation, Appointments and schedules, Telephone, Patient satisfaction                                                                                                                                                                                                                                 |
|                               |                                                                                                                                                                                                                                                                                                                                    |

SCHOLARONE™  
Manuscripts

1  
2  
3  
4 **A qualitative study of patient views on a 'telephone-first' approach in general practice: speaking to**  
5 **the GP by telephone before making face-to-face appointments**  
6

7 Sarah Ball <sup>1</sup>, Jennifer Newbould<sup>1</sup>, Jennie Corbett<sup>1</sup>, Josephine Exley<sup>1</sup>, Emma Pitchforth<sup>1 3</sup>, Martin  
8 Roland<sup>2</sup>.  
9

10  
11  
12 <sup>1</sup> Cambridge Centre for Health Services Research, RAND Europe, Westbrook Centre, Cambridge CB4  
13 1YG, UK  
14

15  
16 <sup>2</sup> Cambridge Centre for Health Services Research, Institute of Public Health, University of Cambridge,  
17 Forvie Site, Cambridge CB2 0SR, UK  
18

19  
20 <sup>3</sup> University of Exeter University of Exeter Medical School, St Luke's Campus Heavitree Road, Exeter  
21 EX1 2LU, UK  
22  
23

24  
25 Correspondence to: Sarah Ball, Cambridge Centre for Health Services Research, RAND Europe,  
26 Westbrook Centre, Cambridge CB4 1YG, UK, Email - [sarahb@rand.org](mailto:sarahb@rand.org), Telephone - +44 1223 353  
27 329 x 2594  
28

29  
30  
31 Author email addresses:

32 Jennifer Newbould - [newbould@rand.org](mailto:newbould@rand.org)

33 Jennie Corbett - [jenniecorb@gmail.com](mailto:jenniecorb@gmail.com)

34 Josephine Exley - [Josephine.Exley@lshtm.ac.uk](mailto:Josephine.Exley@lshtm.ac.uk)

35 Emma Pitchforth - [E.Pitchforth@exeter.ac.uk](mailto:E.Pitchforth@exeter.ac.uk)

36 Martin Roland - [mr108@medschl.cam.ac.uk](mailto:mr108@medschl.cam.ac.uk)  
37  
38  
39  
40  
41  
42  
43

44 **Abstract**

45 Objective: To understand patients' views on a 'telephone-first' approach, in which all appointment  
46 requests in general practice are followed by a telephone call from the GP, and to identify the  
47 characteristics of practices and patients that appear to influence the acceptability of the approach  
48

49 Design: Qualitative interviews with patients and carers

50 Setting: Twelve general practices in England

51  
52 Participants: 43 patients, including 30 women, nine aged over 75, four parents of young children,  
53 five carers, five patients with hearing impairment and two whose first language was not English.  
54  
55  
56  
57  
58  
59  
60

1  
2  
3 Results: Patients expressed varied views, often strongly held, ranging from enthusiasm for to  
4 hostility towards, the 'telephone-first' approach. The new system suited some patients, avoiding the  
5 need to come into the surgery, but was problematic for others e.g. when it was difficult for someone  
6 working in an open plan office to take a call-back. A substantial proportion of negative comments  
7 were about the operation of the scheme itself rather than the principles behind it, for example  
8 difficulty getting through on the phone or being unable to schedule when the GP would phone back.  
9 Some practices were able to operate the scheme in a way that met their patients' needs better than  
10 others and practices varied significantly in how they had implemented the approach.  
11  
12

13 Conclusions: The 'telephone-first' approach appears to work well for some patients but others find it  
14 much less acceptable. Some of the reported problems related to how the approach had been  
15 implemented rather than the 'telephone-first' approach in principle and suggests there may be  
16 potential for some of the challenges experienced by patients to be overcome.  
17  
18

19 265 words  
20

#### 21 Key words

22 General practice

23 Remote consultation

24 Appointments and schedules

25 Telephone

26 Patient satisfaction  
27  
28  
29  
30  
31

#### 32 Strengths and limitations of this study

33 Participants included a wide range of patients and carers from a diverse group of practices.  
34

- 35 • Patients and carers selected for interview had recent experience of the telephone-first  
36 approach.
- 37 • Participants were purposively sampled to include a wide range of views on the new  
38 approach.
- 39 • Semi-structured interviews allowed participants to discuss in detail their own experiences of  
40 the telephone first approach
- 41 • Practices agreeing to take part in the study may have been operating the telephone-first  
42 approach more successfully than those that declined.  
43  
44  
45  
46  
47  
48

#### 49 Introduction

50  
51 Increasing demand for general practice care is leaving practices in the UK struggling to meet patient  
52 need.<sup>1</sup> In response, some practices (at least 150 in England) have adopted a novel 'telephone-first'  
53 approach to managing patient requests for a consultation. In this whole system approach, all  
54 appointment requests are followed by a telephone call from the general practitioner (GP). Either the  
55  
56  
57  
58  
59  
60

1  
2  
3 issue is resolved during this call through provision of advice, a prescription or redirection to another  
4 health professional, or the patient is invited for a face-to-face consultation, usually on the same day.

5  
6 Currently, two commercial companies (Dr First and GP Access) promote this approach in the UK and  
7 provide management support to practices adopting it. The approach has been advocated by NHS  
8 England based on significant benefits reported by the companies including improved access to  
9 primary care, improved patient satisfaction and reductions in both primary and secondary care  
10 utilisation.<sup>2</sup> However, an independent evaluation that we carried out found no evidence of an overall  
11 reduction in GP workload, no evidence of reduced secondary care costs and, while patients were  
12 able to be seen much more quickly, there was little overall improvement in patient satisfaction as  
13 expressed in patient surveys.<sup>3</sup>

14  
15  
16 While published studies on patient satisfaction with GP telephone consultations in general report  
17 positive findings<sup>4,5,6</sup>, the telephone-first approach is a much more fundamental innovation in service  
18 provision and the National Association for Patient Participation has raised a range of concerns and  
19 opposition to the approach.<sup>7</sup> The patient surveys described in a previous paper<sup>3</sup> elicited a wide  
20 range of views about the telephone-first approach, from strongly positive to strongly negative. In  
21 this paper, we report the findings of qualitative interviews conducted with patients and carers to  
22 explore these views in greater depth.

## 23 24 25 26 Methods

### 27 28 *Site selection, sampling and recruitment*

29  
30 Qualitative interviews with patients were undertaken in twelve GP practices using the telephone-  
31 first approach. Participating practices came from areas of England including the North East, North  
32 West, Midlands, East Anglia, London, the South East and the South West. Practices were selected  
33 purposively from the twenty practices participating in a patient and carer survey as part of our wider  
34 evaluation,<sup>2</sup> to include those with a range of experiences of adopting the 'telephone-first' approach,  
35 including practices reporting positive experiences and those that had experienced or overcome  
36 problems.

37  
38 In the first instance, patients who were potential participants indicated their interest in being  
39 contacted for an interview by returning a reply slip that accompanied the patient and carer survey.  
40 Purposive sampling of those who expressed an interest was carried out by the research team, to gain  
41 a range of views and to ensure people with the following characteristics were included: older  
42 people, people who work, people with disabilities, people with chronic conditions and those with  
43 English as a second language. Selected interested participants were contacted by a member of the  
44 research team by the preferred contact mode indicated in the reply slip (telephone or email) and  
45 invited to take part in an interview.

### 46 47 48 49 *Data collection*

50  
51 Semi-structured interviews were conducted by four researchers (SB, JN, JC, JE), either at the  
52 patient's home or at their GP surgery, as requested by the patient. All interviewees gave written  
53 consent to be interviewed. A common interview guide, informed by the literature, was used for each  
54 interview (see appendix), although emphasis was given to allowing participants to talk from their  
55  
56  
57  
58  
59  
60

own perspective and elements of the guide were developed iteratively as the study progressed. The main focus of the interview was on patients' and carers' views of the advantages and disadvantages of the 'telephone-first' approach including its convenience, perceptions of quality of care and impacts on the doctor-patient relationship. Interviews were audio-recorded with the participants' permission, and transcribed verbatim. Transcripts were anonymized by removing references to identifiable names and places.

#### *Data analysis and reporting*

Data analysis proceeded in parallel with data collection and informed the iterative development of the interview topic guide and observation protocol. Thematic analysis of the data was conducted based on the principles outlined by Boyatzis.<sup>8</sup> Transcripts were read and re-read and 'codes' applied to meaningful sections of text. Coding was conducted by SB, JC, JE, JN and EP. As analysis progressed codes were grouped into overarching or organising themes using NVivo 10 software. Data within themes were scrutinized for confirming and disconfirming views across the range of participants. Emerging findings were shared and discussed regularly within the study team. In addition to understanding patients' views and experiences of the 'telephone-first' approach we sought to identify characteristics of both practices and patients which appeared to have influenced its acceptability to patients. We have followed SRQR reporting guidelines.<sup>9</sup>

#### *Patient involvement*

A study steering group was established, which included four patients along with healthcare professionals. The steering group met on three occasions and provided input into the design and conduct of the study including advice on patient materials produced during the study. Patient representatives from the steering group and those from participating practices attended a learning event at which practices shared their experiences of the 'telephone-first' approach and commented on our findings to inform their interpretation.

#### Results

Interviews were conducted with 43 patients and carers registered at 12 GP practices across England, all of which had been using the 'telephone-first' approach for between 18 months and 5 years. Respondents were aged between 28 and 86 years and included older people, parents of young children, carers, working people and a number of other 'hard to reach' groups (Table 1). The practices at which the patients were registered varied with respect to: list size, geographical location and a range of characteristics of the catchment population, such as deprivation and ethnicity. The characteristics of these practices and further details on the characteristics of the patients and carers interviewed are outlined in Appendix 1.

| Characteristics | Number of interview subjects (%) |
|-----------------|----------------------------------|
|-----------------|----------------------------------|

|                                 |            |
|---------------------------------|------------|
| Female                          | 30 (69.8%) |
| Aged over 75                    | 9 (20.9%)  |
| Parent of child under 13 years  | 4 (9.3%)   |
| Carer <sup>1</sup>              | 5 (11.6%)  |
| Working                         | 11 (25.6%) |
| Hearing impaired                | 5 (11.6%)  |
| First language not English      | 2 (4.7%)   |
| Living with a chronic condition | 24 (55.8%) |
| <b>Total</b>                    | <b>43</b>  |

<sup>1</sup> All five carers were interviewed in both their capacity as a carer and as a patient

*Table 1. Characteristics of interview participants*

Interviews provided a rich source of data, and patients were open in expressing their views (ranging from enthusiasm to hostility towards the approach), describing their experiences and reporting on a range of perceived advantages and disadvantages. The findings are structured around two main questions. First, which aspects of the approach were acceptable or unacceptable to patients, and secondly which factors influenced the acceptability of the approach.

#### *Overall acceptability of the 'telephone-first' approach*

While the majority of patients, when asked to make a choice, said that they would stick with the 'telephone-first' approach rather than return to the system that their practice previously ran, their responses were nonetheless extremely varied: some patients reported being highly satisfied, others found the approach unacceptable.

Several gave strong endorsements, including one who commented that:

*Apart from just jumping in the car and going walking into a doctor's, there's no other way you could improve that. (101\_1002 – Male patient in his 70s, retired, minor health issues requiring specialist input, hearing impairment)*

In contrast, a small number of patients reported being so dissatisfied with the approach that they were considering moving to a different practice:

*I just don't like it [the 'telephone-first' approach]. [...] I just want a doctor's where I can go in, phone up, whatever which way I want to do it, book an appointment and go. [...] I don't feel like I've got any help anywhere. (103\_1042 – Female patient in her 50s, not in employment, mental and chronic physical health problems)*

Others were ambivalent, considering the new approach to be the least bad option:

*I'm prepared to stick with it because, I mean, going back to the old system, no. That's even worse. (106\_1077 – Female patient in her 60s, not in employment, mental health and multiple chronic physical health problems)*

1  
2  
3 In describing their experiences of the approach, patients outlined a broad range of advantages and  
4 disadvantages in relation its impact on how they were able to access care and the nature or quality  
5 of the care received. These fell into a number of distinct categories considered in turn below.  
6

#### 7 *Acceptability of the booking process*

8  
9 While several patients described how the initial contact with the practice to request an appointment  
10 was more streamlined following the changes, a greater number reported difficulties with or  
11 objections to the new booking process (such as long waits for calls to be answered, restricted  
12 opening times for telephone lines or a lack of clarity around how the system worked). One patient,  
13 among a number who reacted with hostility to the introduction of the approach, described a  
14 situation in which it had taken days to get to speak to a GP:  
15

16  
17 *.... tried for two days, press five [for automatic redial] still off - and on the*  
18 *Thursday someone actually answered. [...] Said 'what is it?' so I said what*  
19 *[was wrong] and I need to see the Doctor. They phoned me back then. She*  
20 *says well Doctor [name redacted] is not in today - phone tomorrow. Bump*  
21 *[phone being hung up]. So I phoned the next morning 8 o'clock. Phones off. I*  
22 *phoned every five minutes till 8.30am - it came on, 'surgery's now full',*  
23 *phone Monday. [...]You should try the system... It's that bad you couldn't*  
24 *make it up. If they had someone to report it to I'd prosecute them. They're*  
25 *terrible. (110\_1026 – Male patient in his 70s, retired, multiple chronic*  
26 *conditions and mental health issues)*  
27

28  
29 Several patients reported having a lack of awareness of how the approach would work in practice at  
30 the outset, and were unhappy with a lack of consultation around its introduction, which led to  
31 confusion, anxiety and misconceptions regarding the purpose behind the introduction of the  
32 approach. A similar number of patients however, commented that their initial misgivings had not, by  
33 and large, been realized. The degree to which patients reported that they had been consulted (or at  
34 least informed) ahead of the introduction of the new approach also varied considerably.  
35

#### 36 *Responsiveness of the approach*

37  
38 More than half the patients interviewed commented on the prompt response of GPs following their  
39 initial call to the surgery. Guaranteed same-day call-backs (in some cases within minutes or within an  
40 agreed time slot) reassured patients who were anxious about what might be wrong with them, and  
41 the availability of timely face-to-face appointments (if required) was appreciated by many:  
42

43  
44 *This way I find if he [the GP] deems it serious enough for you to call in to see*  
45 *him, he'll see you the same day, which is brilliant. (100\_1004 – Female*  
46 *patient in her early 70s, retired, multiple chronic health issues)*  
47

48  
49 Patients at some practices however, described a delayed or unpredictable response, with no  
50 indication as to when the doctor would call back or a lack of availability of appointments after  
51 speaking to the doctor. Variability between the reports of patients at different practices suggests  
52 differences in the way the call-back system was managed. Several patients indicated that they were  
53 happy to wait for a call back, in the knowledge that calls were prioritized according to need:  
54  
55  
56  
57  
58  
59  
60



1  
2  
3 *I mean sometimes if he's [the GP] really busy, you don't hear from him for a*  
4 *couple of hours but then he's obviously got patients there that are a priority.*  
5 *They know how to prioritize them which is good. (102\_1014 – Female*  
6 *patient, in her late 70s, retired, multiple chronic conditions)*  
7

8 Several other patients, however, described finding this unpredictability particularly difficult,  
9 including a patient whose job as a support worker meant that she was unable access her mobile  
10 phone during a shift and two patients with mental health issues who reported feeling distressed  
11 while they waited for a response from the GP. A few patients, whilst commenting on the  
12 inconvenience of having to wait, acknowledged that this had not been a particular issue for them,  
13 but indicated concern that it would be an issue in case of an urgent need.  
14  
15

#### 16 *Equitable / fair access to care*

17  
18 More than a quarter of patients interviewed indicated that they appreciated that the 'telephone-  
19 first' approach led to more efficient use of resources and improved access for patients with the  
20 greatest need for urgent care, and several recognized that this in turn conferred benefits to them as  
21 individuals (ensuring prompt access if required):  
22

23 *you get to speak to a doctor before you go in for your appointment, because*  
24 *I think there are a lot of times when you actually don't need to see a doctor*  
25 *face to face but, sometimes the advice of a doctor can put your mind at ease*  
26 *or just give you the information that you need to know - so then, you are not*  
27 *wasting your time and you are not wasting their time. (117\_1066 – Female*  
28 *patient in her 30s, single mother in part time work, infrequent user of GP)*  
29

30 *It's better this way because then you don't get any timewasters. [...] Then*  
31 *you haven't got to wait. They put you first before the timewasters.*  
32 *(105\_1043 - Female patient, mother of young child, both with chronic health*  
33 *issues)*  
34

35  
36 Patients differed in their perceptions of the intended function of the approach with respect to  
37 redirecting patient demand. While some patients perceived the 'telephone-first' approach to be a  
38 fair system for meeting patient need, others saw it as a barrier, intended to keep as many patients as  
39 possible away from face-to-face appointments with busy doctors:  
40

41 *It certainly feels like a gate-keeping service [...] like being kept as much at*  
42 *arm's length as possible. (114\_1058 –Female patient in her early 70s,*  
43 *retired, chronic health issues)*  
44

45 Several patients described feeling a requirement to justify their requests to see a doctor face-to-  
46 face, needing to '*fight and [...] protest to have an appointment to see a doctor*' (103\_1042 - Female  
47 in her 50s, not in employment, mental and chronic physical health problems). Several others  
48 expressed concern on behalf of vulnerable patients, such as the elderly or those with mental health  
49 issues, who may lack the confidence or communication skills to push for an appointment when  
50 required.  
51  
52

#### 53 *Convenience and flexibility of the approach*

54  
55  
56  
57

1  
2  
3 More than half the patients interviewed reported that they found that the approach enabled more  
4 convenient access to advice and care than the system previously in place, with benefits including:  
5 being able to get on with daily activities rather than having to wait for long periods in the surgery  
6 (facilitated by the availability of mobile telephone contact); reduced need to travel to the surgery  
7 unnecessarily (a particular benefit for those whom travelling to the surgery was difficult, such as a  
8 mother with disabled children, a carer whose husband was disabled with chronic conditions and  
9 mobility issues, and those dependent on limited public transport services); and access to medication  
10 without the need for a face-to-face appointment:  
11  
12

13 *I like the fact that on a day like today, it is chucking it down, it's miserable,*  
14 *it's cold, if my mum had had to come to the doctor instead of a phone call on*  
15 *any day where the weather was like this, it would have caused her a lot of*  
16 *pain. (102\_1031 – Female patient in her 40s, works part time, ongoing*  
17 *mental and physical health issues)*  
18

19 The remainder, however, found the approach inconvenient in one or more respects, including: not  
20 being able to book appointments in advance; receiving a call from the GP at inconvenient times  
21 (when shopping, on public transport, or at work); or having to stay at home to wait for a call,  
22 particularly if it related to a personal issue that it was difficult to discuss in public:  
23  
24

25 *you can't sit glued to your phone all day waiting for a call, even if you've got*  
26 *a mobile phone, you might be in the shower, or you might be in a shop or on*  
27 *the other phone or something. So it doesn't work... and how people who are*  
28 *working, expect to get an appointment I don't know really. (110\_1007 –*  
29 *Female patient, early retirement due to ill health)*  
30

31 Patients at several practices, described how such issues had been addressed by ensuring flexibility in  
32 the approach, such as by accommodating patient requests for a call-back at a particular time or  
33 offering limited advanced bookings for those unable to attend on the same day.  
34

35 Similarly, a number of patients with particular difficulties that had an impact on how they were able  
36 to interact with the practice using the 'telephone-first' approach, described how such difficulties  
37 were overcome by minor adjustments and a flexible approach e.g. special arrangements for patients  
38 whose first language was not English, or those with a hearing impairment.  
39  
40

#### 41 *Communication by telephone and the nature of the telephone consultation*

42 Patients described advantages and disadvantages of initially consulting by telephone rather than  
43 face-to-face. While some patients described feeling very comfortable communicating by telephone,  
44 including two patients with mental health issues who preferred telephone consultations because  
45 they felt more relaxed, others reported difficulties describing symptoms or understanding and  
46 recalling the GP's advice. Several patients reported that they felt anxious when communicating on  
47 the telephone (including older people, those with mental health issues, hearing impairment and one  
48 for whom English was not their first language), or reported concerns on behalf of other patients:  
49  
50

51 *I've got a friend, an old lady who's 88, going on 89, I think, and she*  
52 *absolutely hates [it]. She says "I can't talk on the phone, I just don't know*  
53 *what to say, I just go to pieces." And somebody like her, it's just totally awful*  
54 *you know, it's not satisfactory at all. (110\_1007 – Female patient in her 60s,*  
55 *early retirement due to ill health)*  
56  
57

1  
2  
3 A number of patients (the majority of whom were in their 50s or 60s with chronic conditions or  
4 mental health issues), commented that they found the approach to be impersonal – rushed and to  
5 the point. This was in part attributed to a lack of relational continuity of care (see below) but also  
6 due to the nature of the telephone consultation itself, and the absence of the social cues present in  
7 face-to-face interaction. One patient with mental health issues described the negative impact of a  
8 lack of face-to-face contact on the nature of the consultation:  
9

10  
11 *I just cannot cope with not seeing someone's face [...] I just want to speak in*  
12 *a room with the door closed face-to-face with someone so that I can be*  
13 *honest about how I am feeling and what's been happening lately. So I don't*  
14 *really say much over the phone [...] whereas if it was face-to-face I would*  
15 *explain more* (110\_1095 – Female patient in her 60s, part-time work,  
16 ongoing mental health issues)  
17

### 18 *Changes to the nature of face-to-face appointments*

19 While the majority of patients did not report changes in the nature of face-to-face appointments  
20 following the introduction of the 'telephone-first' approach, a small number noted improvements  
21 such as reduced waiting time in surgery and a calmer more relaxed atmosphere, with patients  
22 experiencing less time-pressure during appointments. Some patients suggested that the approach  
23 led to GPs being better prepared and the appointment being more streamlined as a result. A few  
24 among those who did not observe any difference in the nature of face-to-face appointments,  
25 however, commented that having to repeat details given over the telephone in the face-to-face  
26 appointment was an annoyance and appeared inefficient.  
27  
28  
29

### 30 *Continuity of care*

31 Given claims made by commercial providers that the 'telephone-first' can improve continuity of care  
32 for patients, interviewees were asked specifically about changes in the ease with which they were  
33 able to see a preferred GP. A small number of patients reported finding it easier to see or speak to  
34 their preferred GP than with the previous system, as a result of the way in which calls were allocated  
35 within the practice, with patients being able to specify which GP they would like to call them back. If  
36 this was not possible, they could request a face-to-face appointment with the preferred GP during  
37 the telephone call. A significant number, however, reported the opposite and found it harder to see  
38 their GP of choice, observing a trade-off between being seen or spoken to quickly and seeing their  
39 preferred GP.  
40  
41  
42

43 Several patients expressed concern about whether an unfamiliar GP could effectively assess an issue  
44 over the telephone and worried about the lack of opportunity to develop or sustain a relationship  
45 with a GP (a particular concern among patients with chronic conditions and those with ongoing  
46 mental health issues):  
47  
48

49 *[an unknown] GP rang me back and I wasn't sure whether he knew anything*  
50 *about me. I'm quite sure he'd looked at my records very briefly but I was*  
51 *concerned because it's quite complicated and my preferred GP knows from*  
52 *day one and has worked with me and referred me and supported me, so I*  
53 *didn't know how much this person knew and I just was a little bit unsure and*  
54 *a little bit anxious about whether or not he knew enough about me*  
55 *(110\_1095 – Female in her 60s, part-time work, ongoing mental health*  
56 *issues)*  
57

### *Patient safety*

Patient views on the impact (or potential impact) of the 'telephone-first' approach on patient safety also varied considerably between patients and across practices (with around a third expressing some concerns). While some patients felt vulnerable because of difficulties getting through to the practice by telephone or that diagnoses might be missed in telephone consultations, others thought the approach was safer for patients, in part because of the considerable reduction in waiting times for appointments:

*Well I think you get to talk to your doctor when you need to talk to him or her, rather than having a long wait and perhaps getting progressively worse. Certainly if it's an acute condition, it can make a difference, can't it?* (100\_1004 - Female patient in her early seventies, retired, multiple chronic health issues)

*So I phoned up and it was early in the morning and I mentioned to the receptionist what the problem was, and so within minutes another doctor phoned back and he said you, had better come down.* (117\_1029 - Female patient in her 60s with chronic health issues, not in employment, caring responsibilities)

### *Confidentiality*

A significant proportion of patients expressed concerns regarding confidentiality associated with the 'telephone-first' approach, as the system generally required the receptionist to ask the patient for brief details of their problem:

*you know that whatever you say to a doctor is going to stay with the doctor, with the receptionist, you are never quite sure if it's going to stay there* (117\_1066 - Single mother in her 30s, part-time work, infrequent user of GP)

Strong feelings were expressed on this subject, with one patient describing the approach as '*absolutely disgusting*' (103\_1042). Concern was even expressed by patients who acknowledged the benefit of providing the information in order for calls to be prioritized. Patients also reported concerns about confidentiality associated with the telephone consultation itself, especially if they had to receive the call back from the GP at a time and/or in a location where their conversation could be overheard, whether at home with family members present, in a work setting or on public transport.

### *Factors influencing whether the 'telephone-first' approach works for patients*

As outlined above, there were differences between patients regarding the nature of the advantages and disadvantages reported in relation to the 'telephone-first' approach. It was also clear from the interviews that the value given to advantages and disadvantages varied significantly, even between patients from the same practice or with similar characteristics. For example, a disadvantage that represented a mild annoyance for one patient could represent a 'deal-breaker' for another, rendering the approach completely unacceptable. One patient described the effect of having to wait a long time for a call back from a GP whilst in a distressed state, and how this had influenced her decision to leave the practice:

*I was really low and so I think I had to wait a few hours [for a call from the GP] and all that time I was in tears and it still took a couple of hours for the doctor. I thought, "Well, now I can't be bloody bothered." (103\_1042 – Female patient in her 50s, not in employment, mental and chronic physical health problems)*

In addition, while there were common elements to the 'telephone first' approach, there was also significant variation between practices with respect to exactly how the approach was implemented and these could have a major effect on how patients responded to the new system. On the basis of our interview findings we identified characteristics of both practices and patients which influenced the acceptability of the 'telephone-first' approach to patients (tables 2 and 3). The way in which the 'telephone-first' approach was implemented and characteristics of the patients contributed to the acceptability of the approach to individual patients. The interplay between these two sets of factors was also important. Some patients provided long lists of annoyances (difficulty getting through on the telephone, confidentiality concerns when talking to receptionists, not being able to book in advance, not liking waiting for the call back) but still concluded that they preferred the new approach because they could speak to a doctor within hours and see them the same day if they needed to.

| <b>System / practice characteristic</b>                   | <b>Key features associated with acceptability to patients</b>                                                                                                                                                                                                                     |
|-----------------------------------------------------------|-----------------------------------------------------------------------------------------------------------------------------------------------------------------------------------------------------------------------------------------------------------------------------------|
| <b>Capacity of the system to meet demand</b>              | Telephone calls to the practice answered promptly<br>Sufficient appointment slots available for both telephone and face-to-face appointments                                                                                                                                      |
| <b>Flexibility of the approach</b>                        | Some advanced booking available<br>Flexible timing offered for the GP to call back; ability to book the time of the call-back.<br>Whether patients were required to describe their problem to the receptionist<br>Adjustments for patients who found difficulty with the approach |
| <b>Capacity to preserve or enhance continuity of care</b> | Choice of GP offered for telephone consultation and subsequent face-to-face appointment                                                                                                                                                                                           |
| <b>Extent of patient education / knowledge</b>            | Consultation with patients prior to introducing the approach<br>Clear and updated instructions to patients on how the system works                                                                                                                                                |

*Table 2. Practice characteristics which influenced the acceptability of the 'telephone-first' approach for patients.*

| Patient characteristic or resource                  | Key features likely to make the approach more acceptable to individual patients                                                 |
|-----------------------------------------------------|---------------------------------------------------------------------------------------------------------------------------------|
| <b>Communication skills</b>                         | Patients being articulate with good communication skills                                                                        |
| <b>Confidence</b>                                   | Patients having confidence to request the outcome they wanted                                                                   |
| <b>Flexibility of daily schedule</b>                | Patients able to accommodate time constraints of the approach e.g. being at home during the day/ retired/ working flexibly      |
| <b>Access to mobile telephone</b>                   | Patients being easily accessible on a mobile telephone                                                                          |
| <b>Value placed on face-to-face contact with GP</b> | Patients placing less value on face-to-face contact than on ease and speed of access to care                                    |
| <b>Nature of relationship with GP or surgery</b>    | Patients having a longstanding, trusting relationship with a GP and feeling comfortable communicating with him/her by telephone |

*Table 3. Patient characteristics which influenced the acceptability of the 'telephone-first' approach for individual patients.*

### Discussion

The study showed that, consistent with our published quantitative analysis of the patient and carer survey in our evaluation<sup>2</sup>, patients expressed a wide range of views, often strongly held, on the 'telephone-first' approach. Qualitative interviews allowed us to understand these views in greater depth and to explore some of the reasons behind the different views expressed. The new system clearly suited some patients, (e.g. by allowing them to avoid coming into the surgery) but was problematic for others (e.g. when it was difficult for someone working in an open plan office to take a call-back). Variation was evident within as well as between the different patient groups we recruited from and appeared to be influenced by an interplay of individual and practice level characteristics. Notably, a substantial proportion of negative comments were about the operation of the scheme itself rather than the principles behind it, for example, difficulty getting through on the telephone or being unable to schedule when the GP would call back. Some practices were able to operate the scheme in a way that met their patients' needs better than others and practices appeared to vary significantly in how they had implemented the approach, according to patients' accounts.

The National Health Service in England has prioritized improving access to care for several years and the 'telephone first' approach is one attempt to address access problems, while at the same time trying to avoid an increase in practice workload. This study confirms previous research that there is considerable potential for using telephone consultations in general practice<sup>5,10</sup>, and chimes with previous findings that access is not the main driver of patients' satisfaction with their GP practices – with interpersonal aspects of care and helpfulness of receptionists being more important.<sup>11,12</sup>

1  
2  
3 The study highlights the need for clinicians and policymakers to take the needs of patients with  
4 varying care-seeking and interaction approaches into account when making major changes to the  
5 organization of general practice care. This change, while designed to improve access to care and  
6 reduce the workload burden on practices, clearly did not meet the needs of all patients and  
7 provoked outright hostility in some, particularly among those who struggled to access care at all as a  
8 result of issues with how the scheme had been implemented. Practices considering making this  
9 change should reflect on how they can make the scheme flexible for patients' needs, how they can  
10 make it easy for patients to get through on the phone, and how they can use the approach to  
11 enhance both access and continuity of care, and recognize the need for continued development and  
12 adaptation of the approach.  
13  
14

15  
16 A strength of the study is that the interviews included a wide range of patients and carers from a  
17 diverse group of practices, purposively sampled to capture a variety of views on the new approach.  
18 However, a limitation is the likelihood that practices operating the 'telephone-first' approach  
19 successfully were more likely to participate in the patient survey that provided patients who  
20 volunteered to be interviewed. We do not know how the views of patients participating in the study  
21 may compare with other patients, including those in practices that have not implemented the  
22 'telephone-first' approach.  
23  
24

25 Questions that could be addressed by future research are how to develop systems that are flexible  
26 enough to meet the needs of all their patients. While a rigid 'telephone-first' approach for all  
27 consultations does not do this, we observed practices that were modifying this approach (by for  
28 example allowing for some advanced booking of appointments) often on an ongoing basis, to meet  
29 the needs of patients as closely as they could. Successful approaches are likely to be different in  
30 different practices and more work could be done to identify what works best in different  
31 circumstances and to share learning.  
32  
33  
34

### 35 Conclusions

36 The 'telephone-first' approach appears to work well for some patients but others find it much less  
37 acceptable. Some of the reported problems related to how the approach had been implemented  
38 rather than the 'telephone-first' approach in principle and suggests there may be potential for some  
39 of the challenges to be overcome. A range of factors were identified that should be considered by  
40 practices planning the approach in order to maximise its acceptability and best meet the needs of  
41 patients.  
42  
43  
44

45 *Word count: 5178 words + 241 words in tables*

### 46 Acknowledgements:

47 We would like to thank the patients and carers interviewed for this study and those who completed  
48 the questionnaires which provided the basis for participant recruitment. We are grateful to the GPs  
49 and staff at practices taking part in the study for their support with its conduct. We would also like  
50 to thank the GPs, practice manager and patients on the study steering group who gave guidance on  
51 the design and conduct of the study and all those who attended and contributed to study learning  
52 events.  
53  
54  
55  
56  
57

1  
2  
3  
4  
5  
6 Funding: The study was funded by the National Institute for Health Research (HS&DR Project  
7 13/59/40). Part of the funding was used to pay for data to be extracted from practice records by one  
8 of the commercial companies providing management support for the 'telephone-first' approach (GP  
9 Access). GP Access had no input into the analysis or interpretation of the data. The study was  
10 sponsored by Cambridgeshire and Peterborough Clinical Commissioning Group (CCG), who gave  
11 initial approval for the project.  
12

13  
14 This article presents independent research funded by the National Institute for Health Research  
15 (NIHR). The views expressed are those of the author(s) and not necessarily those of the NHS, the  
16 NIHR or the Department of Health.  
17

18  
19 Competing interests: All authors have completed the ICMJE uniform disclosure form at  
20 [www.icmje.org/coi\\_disclosure.pdf](http://www.icmje.org/coi_disclosure.pdf) and declare: no financial relationships with any organisations that  
21 might have an interest in the submitted work in the previous three years; no other relationships or  
22 activities that could appear to have influenced the submitted work.  
23

24  
25 Author statement:

26 All authors contributed to the conception or design of the work, the interpretation of the findings.  
27 SB, JN, JC, JE were involved in data collection. SB, JN, JC, JE and EP conducted data analysis. All  
28 authors were involved in drafting and commenting on the paper and have approved the final  
29 version.  
30  
31

32  
33 Ethical approval: The study was approved by the West of Scotland NHS Research Ethics Service (7th  
34 May 2015, REC reference 16/WS/0088).  
35

36  
37 Data sharing:

38 No additional data are available.  
39  
40

41  
42 

---

References

43  
44 <sup>1</sup> Hobbs FD, Bankhead C, Mukhtar T, Stevens S, Perera-Salazar R, Holt T, et al. Clinical workload in UK  
45 primary care: a retrospective analysis of 100 million consultations in England, 2007-14. *Lancet*  
46 2016;387:2323-30. [https://doi.org/10.1016/s0140-6736\(16\)00620-6](https://doi.org/10.1016/s0140-6736(16)00620-6)  
47

48  
49 <sup>2</sup> NHS England. High quality care now and for future generations: Transforming urgent and  
50 emergency care services in England. Page 35-36. [https://www.england.nhs.uk/wp-](https://www.england.nhs.uk/wp-content/uploads/2013/06/urg-emerg-care-ev-bse.pdf)  
51 [content/uploads/2013/06/urg-emerg-care-ev-bse.pdf](https://www.england.nhs.uk/wp-content/uploads/2013/06/urg-emerg-care-ev-bse.pdf)  
52

53 <sup>3</sup> Newbould J, Abel G, Ball S, Corbett J, Elliott M, Exley J, Martin A, Saunders C, Wilson E, Winpenny E,  
54 Yang M, Roland M. Evaluation of telephone first approach to demand management in English  
55 general practice: observational study. *BMJ* 2017; 358: j4197  
56 [www.bmj.com/content/bmj/358/bmj.j4197.full.pdf](http://www.bmj.com/content/bmj/358/bmj.j4197.full.pdf)  
57



1  
2  
3  
4  
5  
6  
7  
8  
9  
10  
11  
12  
13  
14  
15  
16  
17  
18  
19  
20  
21  
22  
23  
24  
25  
26  
27  
28  
29  
30  
31  
32  
33  
34  
35  
36  
37  
38  
39  
40  
41  
42  
43  
44  
45  
46  
47  
48  
49  
50  
51  
52  
53  
54  
55  
56  
57  
58  
59  
60

---

<sup>4</sup> Hallam L. Access to general practice and general practitioners by telephone: the patient's view. *British Journal of General Practice* 1993; 43: 331-335.

[www.ncbi.nlm.nih.gov/pmc/articles/PMC1372558/pdf/brigenprac00041-0023.pdf](http://www.ncbi.nlm.nih.gov/pmc/articles/PMC1372558/pdf/brigenprac00041-0023.pdf)

<sup>5</sup> McKinstry B, Watson P, Pinnock H, Heaney D, Sheikh A. Confidentiality and the telephone in family practice: a qualitative study of the views of patients, clinicians and administrative staff. *Family Practice* 2009; 26: 344-350 <https://academic.oup.com/fampra/article/26/5/344/635397>

<sup>6</sup> Brant, H, Atherton H, Ziebland S, McKinstry B, Campbell J, Salisbury C. Using alternatives to face-to-face consultations: a survey of prevalence and attitudes in general practice. *British Journal of General Practice* 2016; 66: e460-466. <https://www.ncbi.nlm.nih.gov/pmc/articles/PMC4917048/>

<sup>7</sup> Pereira Gray D, Wilkie P. Patient perspectives on the telephone first system. *BMJ* 2017; 359: j4925. <https://doi.org/10.1136/bmj.j4925>

<sup>8</sup> Boyatzis R. Transforming qualitative information: Thematic analysis and code development. Thousand Oaks, London, & New Delhi. 1998. SAGE Publications.

<sup>9</sup> O'Brien BC, Harris IB, Beckman TJ, Reed DA, Cook DA. Standards for reporting qualitative research: a synthesis of recommendations. *Acad Med.* 2014;89(9):1245-1251.

<sup>10</sup> Campbell J, Fletcher E, Britten N, Green C, Holt T, Lattimer V et al. Telephone triage for management of same-day consultation requests in general practice (the ESTEEM trial): a cluster-randomised controlled trial and cost-consequence analysis. *Lancet* 2014; 384: 1859-68. [https://www.thelancet.com/pdfs/journals/lancet/PIIS0140-6736\(14\)61058-8.pdf](https://www.thelancet.com/pdfs/journals/lancet/PIIS0140-6736(14)61058-8.pdf)

<sup>11</sup> Paddison CA, Abel GA, Roland MO, Elliott M, Lyratzopoulos G, Campbell J. Drivers of overall satisfaction with primary care: evidence from the English General Practice Patient Survey. *Health Expectations* 2013; 18: 1081–1092 <https://onlinelibrary.wiley.com/doi/abs/10.1111/hex.12081>

<sup>12</sup> Cowling T, Majeed A, Harris M. Importance of accessibility and opening hours to overall patient experience of general practice: analysis of repeated cross-sectional data from a national patient survey. *British Journal of General Practice* 2018; 18<sup>th</sup> June. <http://bjgp.org/content/early/2018/06/18/bjgp18X697673?ct=>

## Appendix 1: Characteristics of participants and the 'telephone first' approach

| Specific characteristics of the 'telephone first' approach (from patient perspective)                                                                                                                                                                                                                                                                                                                                                                                                                                                                                                                                                    | ID       | Age <sup>1</sup> | Gender <sup>1</sup> | Ethnicity <sup>1</sup> | Health status <sup>1</sup> | Employment status, nature of health concerns and frequency of GP use <sup>1,2</sup>                | Approach preference <sup>2</sup> |
|------------------------------------------------------------------------------------------------------------------------------------------------------------------------------------------------------------------------------------------------------------------------------------------------------------------------------------------------------------------------------------------------------------------------------------------------------------------------------------------------------------------------------------------------------------------------------------------------------------------------------------------|----------|------------------|---------------------|------------------------|----------------------------|----------------------------------------------------------------------------------------------------|----------------------------------|
| <b>Practice 100</b> (urban, list size 5,000-9,999)<br><b>Notable features:</b> no advance booking of face-to face appointments; patient can specify time for call-back; nurse practitioner triages some requests; choice of GP offered for call-back and face-to-face appointment; duty GP takes phone calls in reception office<br><b>Problems identified:</b> more difficult to see GP of choice on the day; can be difficult to get through to reception on Monday mornings<br><b>Previous system:</b> ring up to book in advance or queue up for same day appointments; same-day appointments often not available                    | 100_1004 | 71               | Female              | white British          | fair                       | Retired; multiple chronic health issues; frequent user of GP                                       | 'Telephone first'                |
|                                                                                                                                                                                                                                                                                                                                                                                                                                                                                                                                                                                                                                          | 100_1006 | 79               | Male                | white British          | good                       | Retired; multiple chronic health issues, infrequent user of GP                                     | 'Telephone first'                |
|                                                                                                                                                                                                                                                                                                                                                                                                                                                                                                                                                                                                                                          | 100_1064 | Adult            | Female              | white British          | fair                       | Carer for 85 year old mother with dementia; both have chronic health issues, frequent user of GP;  | 'Telephone first'                |
|                                                                                                                                                                                                                                                                                                                                                                                                                                                                                                                                                                                                                                          | 100_1086 | 63               | Male                | white British          | good                       | Recently retired; infrequent user of GP                                                            | 'Telephone first'                |
| <b>Practice 101</b> (urban, list size 5,000-9,999)<br><b>Notable features:</b> possible to book telephone consultation in advance if preferred GP not available on the day; individual call back lists for each GP; prompt call-back or patient can specify time; some advance booking of face-to face appointments (for follow-ups or if patient unable to make same day appointment); nurse practitioner triages some requests<br><b>Problems identified:</b> can sometimes be difficult to get through to reception<br><b>Previous system:</b> ring up to book in advance; waited 2-3 days for appointment or longer for preferred GP | 101_1002 | 76               | Male                | white British          | very good                  | Retired; minor health issues requiring specialist input, infrequent user of GP; hearing impairment | 'Telephone first'                |
|                                                                                                                                                                                                                                                                                                                                                                                                                                                                                                                                                                                                                                          | 101_1006 | 65               | Male                | white British          | very good                  | Full time carer for spouse; ongoing health issue requiring specialist input, infrequent user of GP | 'Telephone first'                |
|                                                                                                                                                                                                                                                                                                                                                                                                                                                                                                                                                                                                                                          | 101_1024 | 50               | Female              | other black            | fair                       | Early retirement due to ill health; frequent user of GP                                            | 'Telephone first'                |
|                                                                                                                                                                                                                                                                                                                                                                                                                                                                                                                                                                                                                                          | 101_1086 | 37               | Male                | white British          | good                       | Works full time; ongoing mental and physical health issues; regular review by GP                   | 'Telephone first'                |
| <b>Practice 102</b> (urban, list size <5,000)<br><b>Notable features:</b> quick response from reception to incoming calls; wait for call-back depends on urgency of the issue; some                                                                                                                                                                                                                                                                                                                                                                                                                                                      | 102_1014 | 77               | Female              | white British          | fair                       | Retired; multiple chronic conditions; frequent user of GP                                          | 'Telephone first'                |
|                                                                                                                                                                                                                                                                                                                                                                                                                                                                                                                                                                                                                                          | 102_1019 | 67               | Male                | white British          | poor                       | Retired; multiple chronic conditions; regular user of GP; seeing a specialist; lives alone         | Conventional                     |

1  
2  
3  
4  
5  
6  
7  
8  
9  
10  
11  
12  
13  
14  
15  
16  
17  
18  
19  
20  
21  
22  
23  
24  
25  
26  
27  
28  
29  
30  
31  
32  
33  
34  
35  
36  
37  
38  
39  
40  
41  
42  
43  
44  
45  
46  
47

|                                                                                                                                                                                                                                                                                                                                                                                                                                                                                                                                                                                                                                                                                                                     |          |    |        |               |             |                                                                                                     |                                              |
|---------------------------------------------------------------------------------------------------------------------------------------------------------------------------------------------------------------------------------------------------------------------------------------------------------------------------------------------------------------------------------------------------------------------------------------------------------------------------------------------------------------------------------------------------------------------------------------------------------------------------------------------------------------------------------------------------------------------|----------|----|--------|---------------|-------------|-----------------------------------------------------------------------------------------------------|----------------------------------------------|
| <p>advance booking of follow-up appointments; nurse does some telephone consulting; some forward booking by GPs, patient can always see GP face-to-face if they wish – practice considering making further modifications.</p> <p><b>Problems identified:</b> can sometimes be difficult to get through to reception but this is variable</p> <p><b>Previous system:</b> ring up to book in advance; often waited 3-4 days for appointment but same day appointments available when required</p>                                                                                                                                                                                                                     | 102_1031 | 47 | Female | white British | poor        | Works part time; ongoing mental and physical health issues; frequent user of GP; hearing impairment | 'Telephone first'                            |
|                                                                                                                                                                                                                                                                                                                                                                                                                                                                                                                                                                                                                                                                                                                     | 102_1064 | 65 | Female | white British | good        | Retired; infrequent user of GP                                                                      | 'Telephone first'                            |
| <p><b>Practice 103</b> (urban, list size 5,000-9,999)</p> <p><b>Notable features:</b> receptionist asks patient whether issue is urgent – call backs prioritised dependent on urgency of issue; flexibility in scheduling call back – patient can request a call back on another day if preferred GP is not in; no advance booking of face-to-face appointments</p> <p><b>Problems identified:</b> can be difficult to get through to reception – phone line sometimes goes dead; face-to-face appointments not available if call later in the day requiring patient to call again the following day</p> <p><b>Previous system:</b> walk-in system for on the day appointments or book by phone – 2/3 days wait</p> | 103_1030 | 41 | Female | white British | fair        | Mother of two disabled children; frequent user of GP often for advice by phone                      | 'Telephone first'                            |
|                                                                                                                                                                                                                                                                                                                                                                                                                                                                                                                                                                                                                                                                                                                     | 103_1034 | 78 | Male   | white British | fair        | Retired; very frequent user of GP                                                                   | 'Telephone first'                            |
|                                                                                                                                                                                                                                                                                                                                                                                                                                                                                                                                                                                                                                                                                                                     | 103_1042 | 50 | Female | white British | no response | Does not work; mental and chronic physical health problems; frequent user of GP                     | Conventional                                 |
|                                                                                                                                                                                                                                                                                                                                                                                                                                                                                                                                                                                                                                                                                                                     | 103_1053 | 71 | Female | white British | good        | Retired; frequent user of GP                                                                        | 'Telephone first'                            |
|                                                                                                                                                                                                                                                                                                                                                                                                                                                                                                                                                                                                                                                                                                                     | 103_1074 | 67 | Female | white British | fair        | Retired; infrequent user of GP                                                                      | 'Telephone first', though with modifications |
| <p><b>Practice 104</b> (urban, list size &lt;5,000)</p> <p><b>Notable features:</b> receptionist asks patient for a reason for the call -GP reviews list of reasons given and offers face-to-face appointments to some patients on basis of this information alone (without speaking to patient directly); call-back within an hour by GP or by receptionist to call in for a face-to-face appointment</p> <p><b>Problems identified:</b> can be difficult to get through to reception on the phone on a Monday</p>                                                                                                                                                                                                 | 104_1070 | 54 | Female | white British | fair        | Does not work due to chronic health problems; infrequent user of GP as condition well controlled    | 'Telephone first'                            |
|                                                                                                                                                                                                                                                                                                                                                                                                                                                                                                                                                                                                                                                                                                                     | 104_1087 | 74 | Female | white British | good        | Retired; increasing frequency of GP visits with age                                                 | 'Telephone first'                            |

| Previous system: walk-in system                                                                                                                                                                                                                                                                                                                                                                                                                                                                                                                                                                                                                                                                                                                                          |          |                    |        |               |           |                                                                                                                                                                                 |                   |
|--------------------------------------------------------------------------------------------------------------------------------------------------------------------------------------------------------------------------------------------------------------------------------------------------------------------------------------------------------------------------------------------------------------------------------------------------------------------------------------------------------------------------------------------------------------------------------------------------------------------------------------------------------------------------------------------------------------------------------------------------------------------------|----------|--------------------|--------|---------------|-----------|---------------------------------------------------------------------------------------------------------------------------------------------------------------------------------|-------------------|
| <b>Practice 105</b> (urban, list size ≥ 10,000)<br><b>Notable features:</b> call-back within 30 minutes for urgent issues (wait for call-back depends on urgency); cut off time for patients to call by in order to receive same day call back (e.g. 16.30); nurse triage for some requests; choice of GP offered for call-back and face-to-face appointment; reception spread calls across all GPs, set number of calls per GP per day then a pooled list.<br><b>Problems identified:</b> can be difficult to get through to reception on the phone; online booking no longer available<br><b>Previous system:</b> booking in advance by phone – no difficulty getting an appointment but up to three week wait for non-emergency appointment; on line booking facility | 105_1040 | 79                 | Female | white British | good      | Retired; chronic health issues; frequent user of GP; hearing impairment                                                                                                         | ‘Telephone first’ |
|                                                                                                                                                                                                                                                                                                                                                                                                                                                                                                                                                                                                                                                                                                                                                                          | 105_1043 | Adult <sup>3</sup> | Female | white British | n/a       | Does not work – mother of young child; chronic health issues (self and child); frequent user of GP                                                                              | ‘Telephone first’ |
|                                                                                                                                                                                                                                                                                                                                                                                                                                                                                                                                                                                                                                                                                                                                                                          | 105_1090 | 78                 | Male   | white British | fair      | Retired; multiple chronic health issues; frequent user of GP                                                                                                                    | ‘Telephone first’ |
|                                                                                                                                                                                                                                                                                                                                                                                                                                                                                                                                                                                                                                                                                                                                                                          | 105_1099 | 78                 | Male   | white British | very good | Retired; fit and active; infrequent user of GP                                                                                                                                  | ‘Telephone first’ |
| <b>Practice 106</b> (urban, list size ≥ 10,000)<br><b>Notable features:</b> variable wait for call-back (from almost instant to many hours); choice of GP offered for call-back and face-to-face appointment; some flexibility for GP to book appointment for next day but no advance booking by reception (e.g. follow-up appointments); patients can choose time for call back.<br><b>Problems identified:</b> can be difficult to get through to reception on the phone on a Monday; can wait all day for a call back<br><b>Previous system:</b> booking in advance by phone – was beginning to get more difficult to get an appointment                                                                                                                              | 106_1013 | 53                 | Female | white British | nr        | Works flexibly from home; chronic health issue; anxiety; frequent user of GP; previous missed cancer diagnosis                                                                  | Conventional      |
|                                                                                                                                                                                                                                                                                                                                                                                                                                                                                                                                                                                                                                                                                                                                                                          | 106_1025 | 78                 | Female | white British | fair      | Retired; chronic health issue; frequent user of GP                                                                                                                              | ‘Telephone first’ |
|                                                                                                                                                                                                                                                                                                                                                                                                                                                                                                                                                                                                                                                                                                                                                                          | 106_1026 | 45                 | Female | white British | good      | Not currently working due to ill health; infrequent user of GP                                                                                                                  | ‘Telephone first’ |
|                                                                                                                                                                                                                                                                                                                                                                                                                                                                                                                                                                                                                                                                                                                                                                          | 106_1064 | 68                 | Female | white British | fair      | Retired; chronic health issues but infrequent user of GP                                                                                                                        | ‘Telephone first’ |
|                                                                                                                                                                                                                                                                                                                                                                                                                                                                                                                                                                                                                                                                                                                                                                          | 106_1077 | 61                 | Female | white British | fair      | Does not work; mental health and multiple chronic physical health problems; frequent user of GP                                                                                 | ‘Telephone first’ |
| <b>Practice 108</b> (urban, list size <5,000)<br><b>Notable features:</b> variable wait for call-back (from 30 minutes to many hours); duty GP takes calls all day, others only 8-11am; no advance bookings; recorded message indicates cut off time after which only emergency cases will receive a call back (e.g. 15.00)<br><b>Problems identified:</b> variable reports regarding difficulty getting                                                                                                                                                                                                                                                                                                                                                                 | 108_1032 | 59                 | Female | white British | good      | Works full time but easy to take calls or make appointments; chronic condition; carer for elderly parents (with hearing impairment); frequent user of GP for self and as carer; | ‘Telephone first’ |
|                                                                                                                                                                                                                                                                                                                                                                                                                                                                                                                                                                                                                                                                                                                                                                          | 108_1090 | 66                 | Female | white British | good      | Retired; infrequent user of GP                                                                                                                                                  | Conventional      |
|                                                                                                                                                                                                                                                                                                                                                                                                                                                                                                                                                                                                                                                                                                                                                                          | 108_1099 | 28                 | Female | Chinese       | good      | Student – some difficulty taking calls or                                                                                                                                       | N/a (only         |

|                                                                                                                                                                                                                                                                                                                                                                                                                                                                                                                                                                                                                                                                                                                                                   |          |                    |        |               |      |                                                                                                                                                 |                          |
|---------------------------------------------------------------------------------------------------------------------------------------------------------------------------------------------------------------------------------------------------------------------------------------------------------------------------------------------------------------------------------------------------------------------------------------------------------------------------------------------------------------------------------------------------------------------------------------------------------------------------------------------------------------------------------------------------------------------------------------------------|----------|--------------------|--------|---------------|------|-------------------------------------------------------------------------------------------------------------------------------------------------|--------------------------|
| through on the phone; no longer offered choice of preferred GP; can wait all day for a call back; same-day call back not always available<br><b>Previous system:</b> booking in advance by phone – was beginning to get more difficult to get an appointment                                                                                                                                                                                                                                                                                                                                                                                                                                                                                      |          |                    |        |               |      | making appointments; speaks English as a second language; unfamiliar with UK health system; frequent contact with GP                            | experienced this system) |
| <b>Practice 110</b> (urban, list size 5,000 – 9,999)<br><b>Notable features:</b> phone lines shut off early in the day with recorded message to call the following day; no advance booking available; time of call-back not indicated; separate walk in system also reported to be in operation (bypassing phone system)<br><b>Problems identified:</b> extreme difficulty getting through on the phone; if patient gets through appointments are often unavailable and patient is asked to call the following day; no longer offered choice of preferred GP; can wait all day for a call back;<br><b>Previous system:</b> Advance booking system with long wait of a week or sit and wait on the day. Previously had online system but scrapped. | 110_1007 | 60                 | Female | white British | fair | Early retirement due to ill health; frequent user of GP                                                                                         | Conventional             |
|                                                                                                                                                                                                                                                                                                                                                                                                                                                                                                                                                                                                                                                                                                                                                   | 110_1026 | 74                 | Male   | white British | poor | Retired; multiple chronic conditions requiring specialist input; mental health issues; lives alone; reports limited user of GP due to Telephone | Conventional             |
|                                                                                                                                                                                                                                                                                                                                                                                                                                                                                                                                                                                                                                                                                                                                                   | 110_1095 | 63                 | Female | white/black   | fair | Part time/voluntary work; ongoing mental health issues; reports limited user of GP due to Telephone                                             | Conventional             |
| <b>Practice 112</b> (urban, list size 5,000 – 9,999)<br><b>Notable features:</b> receptionist asks for brief details of issue – patient either put straight through to GP or receives very prompt call back; no advance booking available; separate system for nurse appointments<br><b>Problems identified:</b> difficulty getting through on the phone – might take up to an hour; if patient calls after 9 am call backs are often unavailable and patient asked to call the following day; long wait in the surgery for booked appointment<br><b>Previous system:</b> turn up at 8:00am and sit and wait on the day.                                                                                                                          | 112_1015 | 65                 | Female | white British | good | Retired; infrequent user of the GP                                                                                                              | 'Telephone first'        |
|                                                                                                                                                                                                                                                                                                                                                                                                                                                                                                                                                                                                                                                                                                                                                   | 112_1046 | Adult <sup>3</sup> | Male   | other         | n/a  | Working parent; speaks English as a second language                                                                                             | 'Telephone first'        |
| <b>Practice 114</b> (urban, list size 5,000 – 9,999)                                                                                                                                                                                                                                                                                                                                                                                                                                                                                                                                                                                                                                                                                              | 114_1008 | 48                 | Male   | white British | good | Works/easy to take calls or make                                                                                                                | 'Telephone first'        |

|                                                                                                                                                                                                                                                                                                                                                                                                                                                                                                                                                                                                                                                                                                                     |          |                    |        |               |           |                                                                                                                    |                   |
|---------------------------------------------------------------------------------------------------------------------------------------------------------------------------------------------------------------------------------------------------------------------------------------------------------------------------------------------------------------------------------------------------------------------------------------------------------------------------------------------------------------------------------------------------------------------------------------------------------------------------------------------------------------------------------------------------------------------|----------|--------------------|--------|---------------|-----------|--------------------------------------------------------------------------------------------------------------------|-------------------|
| <p><b>Notable features:</b> receptionist does not ask about the nature of the issue (change from original system); receptionist provides indication of time for call-back and can schedule flexibly around patient's requirements; advance booking available for some follow-up appointments; nurse practitioner does some telephone consulting</p> <p><b>Problems identified:</b> system functioning well</p> <p><b>Previous system:</b> ring to book face-to-face appointment same day appointments were always available if required.</p>                                                                                                                                                                        |          |                    |        |               |           | appointments; chronic health issues; frequent user of GP                                                           |                   |
|                                                                                                                                                                                                                                                                                                                                                                                                                                                                                                                                                                                                                                                                                                                     | 114_1029 | Adult <sup>3</sup> | Female | white British | n/a       | Carer for elderly father; works from home; frequent user of GP for self and as carer                               | 'Telephone first' |
|                                                                                                                                                                                                                                                                                                                                                                                                                                                                                                                                                                                                                                                                                                                     | 114_1058 | 72                 | Female | white British | poor      | Retired; chronic health issues; frequent user of GP                                                                | Conventional      |
| <p><b>Practice 117</b> (urban, list size 5,000 – 9,999)</p> <p><b>Notable features:</b> prompt call-back from GP (often within 10-15 minutes – maximum 1 hour 30 minutes); no advance booking of face-to-face appointments; if preferred GP is not available patient offered choice to speak to a different GP or ring back when available; call back only available for emergencies after 16.00</p> <p><b>Problems identified:</b> time cut off to ensure face-to-face appointment available on the day is unclear;</p> <p><b>Previous system:</b> same day appointment system - rang on the day and had to see whoever was available that day or ring the next day. Sometimes a long wait to see Dr of choice</p> | 117_1027 | 51                 | Female | white British | very good | Works/difficult to take calls; infrequent user of GP;                                                              | 'Telephone first' |
|                                                                                                                                                                                                                                                                                                                                                                                                                                                                                                                                                                                                                                                                                                                     | 117_1029 | 60                 | Female | white British | poor      | Does not work due to ill health and caring responsibilities; multiple chronic conditions; very frequent user of GP | 'Telephone first' |
|                                                                                                                                                                                                                                                                                                                                                                                                                                                                                                                                                                                                                                                                                                                     | 117_1066 | 32                 | Female | white British | good      | Single mother/part time voluntary work; infrequent user of GP                                                      | 'Telephone first' |
|                                                                                                                                                                                                                                                                                                                                                                                                                                                                                                                                                                                                                                                                                                                     | 117_1073 | 86                 | Male   | white British | good      | Retired; recent hospital stay but previously in good health; infrequent user of GP                                 | 'Telephone first' |

## Appendix 2. Patient interview guide

*This was a broad guide which was developed iteratively as early findings were reviewed by members of the research team*

### Introduction:

Please can you tell me a little bit about yourself, including whether you work

How long have you been at the practice?

How is your health in general? How regularly do you need access the GP?

### Process of booking an appointment:

How do you make an appointment with your GP?

Has this changed since you have been a patient at the practice? (What used to happen?)

Have you had to call the surgery on behalf of someone else / or has someone else called on your behalf? How did that work?

When you call the surgery, how long does it take to get through? Have you experienced any difficulty in getting through?

Do you have to provide any information to the reception staff concerning the call? [could prompt here for how comfortable they feel speaking to receptionist?]

If offered a call back do you get it within a reasonable time period? Do you get to specify when you would like the call back? Have you had any difficulties around the call back?

Is it always a doctor that calls you back? If you have a preferred doctor, do you get to speak to them? [prompt on continuity of care]

Have there been any changes in how the telephone consultations have been run since they were introduced? Has that improved the service/ made it more difficult for you?

### Your experience with telephone consultations:

How have you found the experience of using this system?

Is there anything about your lifestyle that makes it more or less difficult for you to use? [prompt: working hours, caring responsibilities etc]

What was the outcome of your last telephone consultation with the GP? (led to a face-to-face appointment, directed to another health-care professional such as nurse, or another service eg. Social services etc. or just given advice over the phone)

*If not offered a face-to face appointment with GP:*

Were you happy with this outcome? Do you feel the service was satisfactory? Did you seek care elsewhere instead? (e.g. at A&E)

1  
2  
3 *If offered a face-to-face appointment:*

4 If you have a preferred doctor, did you get to see him/her?

5  
6 Have you noticed any change in the actual appointment [get more time with GP, GP better  
7 prepared etc]? Has the quality of the appointment changed?  
8  
9

10 Have you had other telephone consultations where something different happened? What was the  
11 outcome? [repeat prompts as above]  
12

### 13 **How you feel about the system and what it means for you:**

14 What do you like about the current system for making appointments? ([prompt on convenience,  
15 chance to speak to GP when don't want appointment – reassurance, practice seems more organised,  
16 get an appointment when want one, appointments not being booked by people for unsuitable use]  
17  
18

19 What do you dislike about the current system for making appointments? [don't get an appointment  
20 when want one, can't communicate well using phone – lost personal connection, elderly – loss of  
21 social contact, safety concerns]  
22

23 Is there anything you miss about the old system (e.g. being able to plan in advance)?  
24

25 How do you feel about talking to the doctor on the phone? [prompts: Do you feel comfortable talking  
26 about your medical condition /do you have any concerns over confidentiality? Do you feel that you  
27 are able to make yourself understood?]  
28  
29

30 How did you feel about the system when it was first introduced? Has this changed over time? [i.e.  
31 have they got used to the system]  
32

33 Has the telephone appointment system changed the way you seek health care services? [prompts:  
34 are they thinking about alternative services more before contacting GP? i.e. is this right for the GP  
35 should I be going to nurse or don't bother go straight to A&E?]  
36

37 Has your contact with the GP surgery changed? (i.e. ring more often as know can speak to doctor  
38 etc). [prompt on whether offered an appointment, if not with GP who with? Just given advice over  
39 phone etc]  
40  
41

### 42 **Concluding:**

43 If you had the choice would you go back the old system or keep the new system? Why would you  
44 make that choice?  
45

46 Do you think other patients share your view?  
47

48 Overall are you happy with the care you receive at the practice?  
49

50 Is there anything else about the telephone appointment system that you'd like to discuss that we  
51 haven't spoken about?  
52  
53

54 Thank you for taking the time to meet with me today  
55  
56  
57  
58  
59  
60



## Standards for Reporting Qualitative Research (SRQR)

### Title and abstract

S1 Title Concise description of the nature and topic of the study Identifying the study as qualitative or indicating the approach (e.g., ethnography, grounded theory) or data collection methods (e.g., interview, focus group) is recommended

*The nature / topic of the study is included.*

S2 Abstract Summary of key elements of the study using the abstract format of the intended publication; typically includes background, purpose, methods, results, and conclusions

*These are all included in the abstract.*

### Introduction

S3 Problem formulation Description and significance of the problem/phenomenon studied; review of relevant theory and empirical work; problem statement

*The nature and significance of the problem is described along with a review of empirical work.*

S4 Purpose or research question Purpose of the study and specific objectives or questions

*The objectives of the study are stated in the last sentence of the introduction.*

### Methods

S5 Qualitative approach and research paradigm Qualitative approach (e.g., ethnography, grounded theory, case study, phenomenology, narrative research) and guiding theory if appropriate; identifying the research paradigm (e.g., postpositivist, constructivist/ interpretivist) is also recommended; rationale (The rationale should briefly discuss the justification for choosing that theory, approach, method, or technique rather than other options available, the assumptions and limitations implicit in those choices, and how those choices influence study conclusions and transferability. As appropriate, the rationale for several items might be discussed together).

*See response S6 below*

S6 Researcher characteristics and reflexivity Researchers' characteristics that may influence the research, including personal attributes, qualifications/experience, relationship with participants, assumptions, and/or presuppositions; potential or actual interaction between researchers' characteristics and the research questions, approach, methods, results, and/or transferability

*The approach was principally narrative led by a flexible interview guide which is reproduced in appendix 1. However, as we outline in the paper, the topic guide was developed iteratively, both allowing flexibility within the interview for patients to express their own concerns and to introduce elements which had arisen from preliminary analysis of earlier interviews.*

S7 Context Setting/site and salient contextual factors; rationale

*These are described in the methods and results.*

1  
2  
3 S8 Sampling strategy How and why research participants, documents, or events were selected;  
4 criteria for deciding when no further sampling was necessary (e.g., sampling saturation); rationale  
5

6 *The sampling method is described in the method section, including possible biases that may have*  
7 *been introduced by the method of selecting practices.*  
8

9 S9 Ethical issues pertaining to human subjects Documentation of approval by an appropriate ethics  
10 review board and participant consent, or explanation for lack thereof; other confidentiality and data  
11 security issues  
12

13 *This study was reviewed and given a favourable opinion by the West of Scotland Research Ethics*  
14 *Committee 5 (reference: 15/WS/0088).*  
15

16  
17 S10 Data collection methods Types of data collected; details of data collection procedures including  
18 (as appropriate) start and stop dates of data collection and analysis, iterative process, triangulation  
19 of sources/methods, and modification of procedures in response to evolving study findings;  
20 rationale  
21

22 *These are included in the method section*  
23

24 S11 Data collection instruments and technologies Description of instruments (e.g., interview guides,  
25 questionnaires) and devices (e.g., audio recorders) used for data collection; if/how the instrument(s)  
26 changed over the course of the study  
27

28 *These are described in the methods section*  
29

30  
31 S12 Units of study Number and relevant characteristics of participants, documents, or events  
32 included in the study; level of participation  
33

34 *These are described in the results with further detail provided in a supplementary file*  
35

36  
37 S13 Data processing Methods for processing data prior to and during analysis, including  
38 transcription, data entry, data management and security, verification of data integrity, data coding,  
39 and anonymization/deidentification of excerpts  
40

41 *These are described in the methods section*  
42

43 S14 Data analysis Process by which inferences, themes, etc., were identified and developed,  
44 including the researchers involved in data analysis; usually references a specific paradigm or  
45 approach; rationale  
46

47 *This is described in the method section, including the iterative development of the interview guide*  
48 *and the procedure for checking coding.*  
49

50  
51 S15 Techniques to enhance trustworthiness Techniques to enhance trustworthiness and credibility  
52 of data analysis (e.g., member checking, audit trail, triangulation); rationale  
53

54 *This is described in the method section (multiple coding, regular discussion of emerging findings in*  
55 *the research team).*  
56

#### Results/findings

S16 Synthesis and interpretation Main findings (e.g., interpretations, inferences, and themes); might include development of a theory or model, or integration with prior research or theory

*The results section includes both the main findings and a synthesis of factors affecting the acceptability of the telephone-first approach.*

S17 Links to empirical data Evidence (e.g., quotes, field notes, text excerpts, photographs) to substantiate analytic findings

*The results section contains quotations from patient and carer interviews to substantiate the findings*

#### Discussion

S18 Integration with prior work, implications, transferability, and contribution(s) to the field. Short summary of main findings; explanation of how findings and conclusions connect to, support, elaborate on, or challenge conclusions of earlier scholarship; discussion of scope of application/generalizability; identification of unique contribution(s) to scholarship in a discipline or field

*These are included in the discussion.*

S19 Limitations Trustworthiness and limitations of findings

*These are included in the discussion and also in the bullets which follow the abstract.*

S20 Conflicts of interest Potential sources of influence or perceived influence on study conduct and conclusions; how these were managed

*A conflict of interest statement has been completed by all authors.*

S21 Funding Sources of funding and other support; role of funders in data collection, interpretation, and reporting

*The source of funding and the role of funders is included.*

# BMJ Open

## A qualitative study of patient views on a 'telephone-first' approach in general practice in England: speaking to the GP by telephone before making face-to-face appointments

|                                 |                                                                                                                                                                                                                                                                                                                                    |
|---------------------------------|------------------------------------------------------------------------------------------------------------------------------------------------------------------------------------------------------------------------------------------------------------------------------------------------------------------------------------|
| Journal:                        | <i>BMJ Open</i>                                                                                                                                                                                                                                                                                                                    |
| Manuscript ID                   | bmjopen-2018-026197.R1                                                                                                                                                                                                                                                                                                             |
| Article Type:                   | Research                                                                                                                                                                                                                                                                                                                           |
| Date Submitted by the Author:   | 09-Nov-2018                                                                                                                                                                                                                                                                                                                        |
| Complete List of Authors:       | Ball, Sarah L.; RAND Europe, Cambridge Centre for Health Services Research<br>Newbould, Jennifer ; RAND Europe<br>Corbett, Jennie; RAND Europe<br>Exley, Josephine; London School of Hygiene and Tropical Medicine<br>Pitchforth, Emma; RAND Europe,<br>Roland, Martin; University of Cambridge, GP and Primary Care Research Unit |
| <b>Primary Subject Heading</b>: | General practice / Family practice                                                                                                                                                                                                                                                                                                 |
| Secondary Subject Heading:      | Qualitative research                                                                                                                                                                                                                                                                                                               |
| Keywords:                       | General practice, Remote consultation, Appointments and schedules, Telephone, Patient satisfaction                                                                                                                                                                                                                                 |
|                                 |                                                                                                                                                                                                                                                                                                                                    |

SCHOLARONE™  
Manuscripts

1  
2  
3  
4  
5 **A qualitative study of patient views on a 'telephone-first' approach in general practice in England:**  
6 **speaking to the GP by telephone before making face-to-face appointments**  
7

8 Sarah Ball <sup>1</sup>, Jennifer Newbould<sup>1</sup>, Jennie Corbett<sup>1</sup>, Josephine Exley<sup>1</sup>, Emma Pitchforth<sup>1 3</sup>, Martin  
9 Roland<sup>2</sup>.  
10

11  
12 <sup>1</sup> Cambridge Centre for Health Services Research, RAND Europe, Westbrook Centre, Cambridge CB4  
13 1YG, UK  
14

15  
16  
17 <sup>2</sup> Cambridge Centre for Health Services Research, Institute of Public Health, University of Cambridge,  
18 Forvie Site, Cambridge CB2 0SR, UK  
19

20  
21  
22 <sup>3</sup> University of Exeter University of Exeter Medical School, St Luke's Campus Heavitree Road, Exeter  
23 EX1 2LU, UK  
24

25  
26  
27 Correspondence to: Sarah Ball, Cambridge Centre for Health Services Research, RAND Europe,  
28 Westbrook Centre, Cambridge CB4 1YG, UK, Email - [sarahb@rand.org](mailto:sarahb@rand.org), Telephone - +44 1223 353  
29 329 x 2594  
30

31  
32  
33 Author email addresses:

34 Jennifer Newbould - [newbould@rand.org](mailto:newbould@rand.org)

35 Jennie Corbett - [jenniecorb@gmail.com](mailto:jenniecorb@gmail.com)

36 Josephine Exley - [Josephine.Exley@lshtm.ac.uk](mailto:Josephine.Exley@lshtm.ac.uk)

37 Emma Pitchforth - [E.Pitchforth@exeter.ac.uk](mailto:E.Pitchforth@exeter.ac.uk)

38 Martin Roland - [mr108@medschl.cam.ac.uk](mailto:mr108@medschl.cam.ac.uk)  
39  
40  
41  
42  
43  
44  
45  
46  
47

48 **Abstract**

49 Objective: To understand patients' views on a 'telephone-first' approach, in which all appointment  
50 requests in general practice are followed by a telephone call from the GP.

51 Design: Qualitative interviews with patients and carers

52 Setting: Twelve general practices in England

53 Participants: 43 patients, including 30 women, nine aged over 75, four parents of young children,  
54 five carers, five patients with hearing impairment and two whose first language was not English.

55 Results: Patients expressed varied views, often strongly held, ranging from enthusiasm for to  
56 hostility towards, the 'telephone-first' approach. The new system suited some patients, avoiding the  
57  
58  
59  
60

1  
2  
3 need to come into the surgery, but was problematic for others e.g. when it was difficult for someone  
4 working in an open plan office to take a call-back. A substantial proportion of negative comments  
5 were about the operation of the scheme itself rather than the principles behind it, for example  
6 difficulty getting through on the phone or being unable to schedule when the GP would phone back.  
7 Some practices were able to operate the scheme in a way that met their patients' needs better than  
8 others and practices varied significantly in how they had implemented the approach.  
9

10  
11 Conclusions: The 'telephone-first' approach appears to work well for some patients but others find it  
12 much less acceptable. Some of the reported problems related to how the approach had been  
13 implemented rather than the 'telephone-first' approach in principle and suggests there may be  
14 potential for some of the challenges experienced by patients to be overcome.  
15

16  
17 247 words  
18

### 19 20 21 Key words

22 General practice

23 Remote consultation

24 Appointments and schedules

25 Telephone

26 Patient satisfaction  
27  
28  
29

### 30 31 32 Strengths and limitations of this study

33 Participants included a wide range of patients and carers from a diverse group of practices.

- 34 • Patients and carers selected for interview had recent experience of the 'telephone-first'  
35 approach.
- 36 • Participants were purposively sampled to include a wide range of views on the new  
37 approach.
- 38 • Semi-structured interviews allowed participants to discuss in detail their own experiences of  
39 the 'telephone-first' approach
- 40 • Practices agreeing to take part in the study may have been operating the 'telephone-first'  
41 approach more successfully than those that declined.  
42  
43  
44  
45  
46  
47

### 48 49 Introduction

50 Increasing demand for general practice care is leaving practices in the UK struggling to meet patient  
51 need.<sup>1</sup> In response, some practices (at least 150 in England) have adopted a novel 'telephone-first'  
52 approach to managing patient requests for a consultation. In this whole system approach, all  
53 appointment requests are followed by a telephone call from the general practitioner (GP). Either the  
54 issue is resolved during this call through provision of advice, a prescription or redirection to another  
55 health professional, or the patient is invited for a face-to-face consultation, usually on the same day.  
56

57  
58 Currently, two commercial companies (Dr First and GP Access) promote this approach in the UK and  
59 provide management support to practices adopting it. The approach has been advocated by NHS  
60

1  
2  
3 England based on significant benefits reported by the companies including improved access to  
4 primary care, improved patient satisfaction and reductions in both primary and secondary care  
5 utilisation.<sup>2</sup> However, an independent evaluation that we carried out found no evidence of an overall  
6 reduction in GP workload, no evidence of reduced secondary care costs and, while patients were  
7 able to be seen much more quickly, there was little overall improvement in patient satisfaction as  
8 expressed in patient surveys.<sup>3</sup>

9  
10  
11 While published studies on patient satisfaction with GP telephone consultations in general report  
12 positive findings<sup>4,5,6</sup>, the 'telephone-first' approach is a much more fundamental innovation in  
13 service provision and the National Association for Patient Participation has raised a range of  
14 concerns and opposition to the approach.<sup>7</sup> The patient surveys described in a previous paper<sup>3</sup>  
15 elicited a wide range of views about the telephone-first approach, from strongly positive to strongly  
16 negative. In this paper, we report the findings of qualitative interviews conducted with patients and  
17 carers to explore these views in greater depth.  
18  
19  
20  
21  
22

## 23 Methods

### 24 *Site selection, sampling and recruitment*

25  
26 Qualitative interviews with patients were undertaken in twelve GP practices using the telephone-  
27 first approach. Participating practices came from areas of England including the North East, North  
28 West, Midlands, East Anglia, London, the South East and the South West. Practices were selected  
29 purposively from the twenty practices participating in a patient and carer survey as part of our wider  
30 evaluation,<sup>2</sup> to include those with a range of experiences of adopting the 'telephone-first' approach,  
31 including practices reporting positive experiences and those that had experienced or overcome  
32 problems.  
33  
34  
35  
36

37 In the first instance, patients who were potential participants indicated their interest in being  
38 contacted for an interview by returning a reply slip that accompanied the patient and carer survey.  
39 Purposive sampling of those who expressed an interest was carried out by the research team, to gain  
40 a range of views and to ensure people with the following characteristics were included: older  
41 people, people who work, people with disabilities, people with chronic conditions and those with  
42 English as a second language. Selected interested participants were contacted by a member of the  
43 research team by the preferred contact mode indicated in the reply slip (telephone or email) and  
44 invited to take part in an interview.  
45  
46  
47  
48  
49

### 50 *Data collection*

51 Semi-structured interviews were conducted by four researchers (SB, JN, JC, JE), either at the  
52 patient's home or at their GP surgery, as requested by the patient. All interviewees gave written  
53 consent to be interviewed. A common interview guide, informed by the literature, was used for each  
54 interview (see Appendix 1), although emphasis was given to allowing participants to talk from their  
55 own perspective and elements of the guide were developed iteratively as the study progressed. The  
56 main focus of the interview was on patients' and carers' views of the advantages and disadvantages  
57  
58  
59  
60

of the 'telephone-first' approach including its convenience, perceptions of quality of care and impacts on the doctor-patient relationship. Interviews were audio-recorded with the participants' permission, and transcribed verbatim. Transcripts were anonymized by removing references to identifiable names and places.

### *Data analysis and reporting*

Data analysis proceeded in parallel with data collection and informed the iterative development of the interview topic guide. Thematic analysis of the data was conducted based on the principles outlined by Boyatzis.<sup>8</sup> Transcripts were read and re-read and 'codes' applied to meaningful sections of text. Coding was conducted by SB, JC, JE, JN and EP. As analysis progressed codes were grouped into overarching or organising themes using NVivo 10 software. Data within themes were scrutinized for confirming and disconfirming views across the range of participants. Emerging findings were shared and discussed regularly within the study team. We have followed SRQR reporting guidelines.<sup>9</sup>

### *Patient involvement*

A study steering group was established, which included four patients along with healthcare professionals. The steering group met on three occasions and provided input into the design and conduct of the study including advice on patient materials produced during the study. Patient representatives from the steering group and those from participating practices attended a learning event at which practices shared their experiences of the 'telephone-first' approach and commented on our findings to inform their interpretation.

### Results

Interviews were conducted with 43 patients and carers registered at 12 GP practices across England, all of which had been using the 'telephone-first' approach for between 18 months and 5 years. Respondents were aged between 28 and 86 years and included older people, parents of young children, carers, working people and a number of other 'hard to reach' groups (Table 1).

The practices at which the patients were registered varied with respect to: list size, geographical location and a range of characteristics of the catchment population, such as deprivation and ethnicity. While there were common elements to the 'telephone-first' approach used across the practices under study, there was also significant variation with respect to exactly how the approach was implemented. The characteristics of the practices, the specifics of the 'telephone-first' approach used within them and further details on the characteristics of the patients and carers interviewed are outlined in Appendix 2.

| Characteristics | Number of interview participants (%) |
|-----------------|--------------------------------------|
| Female          | 30 (69.8%)                           |



|                                        |            |
|----------------------------------------|------------|
| <b>Aged over 75</b>                    | 9 (20.9%)  |
| <b>Parent of child under 13 years</b>  | 4 (9.3%)   |
| <b>Carer<sup>1</sup></b>               | 5 (11.6%)  |
| <b>Working</b>                         | 11 (25.6%) |
| <b>Hearing impaired</b>                | 5 (11.6%)  |
| <b>First language not English</b>      | 2 (4.7%)   |
| <b>Living with a chronic condition</b> | 24 (55.8%) |
| <b>Total</b>                           | <b>43</b>  |

<sup>1</sup> All five carers were interviewed in both their capacity as a carer and as a patient

**Table 1. Characteristics of interview participants**

Interviews provided a rich source of data, and patients and carers were open in expressing their views (whether enthusiastic, ambivalent or hostile towards the approach). Whilst the majority of patients, when asked to make a choice, said that they would stick with the 'telephone-first' approach rather than return to the system that their practice had run previously, responses were nonetheless extremely varied: some patients reported being highly satisfied (giving strong endorsements), while others found the approach unacceptable. In describing their experiences of the approach, patients outlined a broad range of advantages and disadvantages in relation to its impact on how they were able to access care and the nature or quality of the care received. A number of themes arose in the analysis, which we present below.

#### *Impact on initial contact with the practice*

A clear theme was the impact of the 'telephone-first' approach on the nature of the initial contact made with the practice when booking an appointment. The perceived impact varied, with some patients describing how the initial contact was more streamlined following the changes, while others reported difficulties with or objections to the new booking process (such as long waits for calls to be answered or restricted opening times for telephone lines). For example, one patient, among a number who reacted with hostility to the introduction of the approach, described a situation in which it had taken days to get through to the practice to make an appointment:

*.... tried for two days, press five [for automatic redial] still off - and on the Thursday someone actually answered. [...] Said 'what is it?' so I said what [was wrong] and I need to see the Doctor. They phoned me back then. She says well Doctor [name redacted] is not in today - phone tomorrow. Bump [phone being hung up]. So I phoned the next morning 8 o'clock. Phones off. I phoned every five minutes till 8.30am - it came on, 'surgery's now full', phone Monday. [...] You should try the system... It's that bad you couldn't make it up. If they had someone to report it to I'd prosecute them. They're terrible. (110\_1026 – Male patient in his 70s, retired, multiple chronic conditions and mental health issues)*

1  
2  
3 Patients attributed difficulties getting through to the practice to the way the approach had been  
4 implemented (such as a lack of reception staff to answer the telephone or shutting the phone lines  
5 early), but also highlighted that the issues caused particular problems for them as individuals, for  
6 reasons such as lacking the time to wait to get through on the telephone, or difficulty calling at the  
7 required time of day (particular issues for working people), or as a result of a personal preference for  
8 making the initial contact with the practice in person rather than by telephone.  
9

10  
11 *I just don't like it [the 'telephone-first' approach]. [...] I just want a doctor's*  
12 *where I can go in, phone up, whatever which way I want to do it, book an*  
13 *appointment and go. (103\_1042 – Female patient in her 50s, not in*  
14 *employment, mental and chronic physical health problems)*  
15  
16

### 17 18 19 *Responsiveness of the practice to patient needs*

20  
21 A further theme related to the perceived impact of the 'telephone-first' approach on the degree to  
22 which the practice was able to be responsive to patient needs. Patients at some practices  
23 commented positively on the prompt response of GPs following their initial call to the surgery.  
24 Guaranteed same-day call-backs (in some cases within minutes or within an agreed time slot)  
25 reassured patients who were anxious about what might be wrong with them, and the availability of  
26 timely face-to-face appointments (if required) was appreciated:  
27  
28

29  
30 *This way I find if he [the GP] deems it serious enough for you to call in to see*  
31 *him, he'll see you the same day, which is brilliant. (100\_1004 – Female*  
32 *patient in her early 70s, retired, multiple chronic health issues)*  
33

34  
35 *Apart from just jumping in the car and going walking into a doctor's, there's*  
36 *no other way you could improve that. (101\_1002 – Male patient in his 70s,*  
37 *retired, minor health issues requiring specialist input, hearing impairment)*

38  
39 Patients at some practices however, described a delayed or unpredictable response, with no  
40 indication as to when the doctor would call back, or a lack of availability of appointments after  
41 speaking to the doctor. Variability between the reports of patients registered at different practices  
42 indicated that there were variations in the way the call-back system was managed, or in the capacity  
43 of practices to adequately meet demand (with respect to the availability of sufficient appointment  
44 slots for both telephone and face-to-face appointments).  
45

46  
47 In addition, interviewees described how their own personal characteristics or circumstances meant  
48 that they found unpredictability (with respect to receiving a response from the practice) particularly  
49 difficult, including a patient whose job as a support worker meant that she was unable access her  
50 mobile phone during a shift and patients with mental health issues who reported feeling anxious or  
51 distressed while they waited for a response from the GP. There was some acknowledgement among  
52 patients commenting on the inconvenience of having to wait for a call back, that this had not been a  
53 particular issue for them, but indicated concern that it would be an issue in case of an urgent need.  
54  
55

### 56 57 58 *Implications for equitable / fair access to care*

59  
60

1  
2  
3 Patients were aware of and expressed strong views with respect to the implications of the  
4 'telephone-first' approach for fairness and equity in access to care. Some patients interviewed  
5 indicated that they appreciated that the 'telephone-first' approach led to more efficient use of  
6 resources and improved access for patients with the greatest need for urgent care, and recognized  
7 that this in turn conferred benefits to them as individuals (ensuring prompt access if required):  
8  
9

10 *you get to speak to a doctor before you go in for your appointment, because*  
11 *I think there are a lot of times when you actually don't need to see a doctor*  
12 *face to face but, sometimes the advice of a doctor can put your mind at ease*  
13 *or just give you the information that you need to know - so then, you are not*  
14 *wasting your time and you are not wasting their time. (117\_1066 – Female*  
15 *patient in her 30s, single mother in part time work, infrequent user of GP)*  
16  
17

18 *It's better this way because then you don't get any timewasters. [...] Then*  
19 *you haven't got to wait. They put you first before the timewasters.*  
20 *(105\_1043 - Female patient, mother of young child, both with chronic health*  
21 *issues)*  
22

23 Patients differed in their perceptions of the intended function of the approach with respect to  
24 redirecting patient demand. While some patients perceived the 'telephone-first' approach to be a  
25 fair system for meeting patient need, others saw it as a barrier, intended to keep as many patients as  
26 possible away from face-to-face appointments with busy doctors, describing feeling the need to  
27 'fight' or 'protest' to justify their requests to see a doctor face-to-face:  
28  
29

30 *It certainly feels like a gate-keeping service [...] like being kept as much at*  
31 *arm's length as possible. (114\_1058 –Female patient in her early 70s,*  
32 *retired, chronic health issues)*  
33  
34

35 Some expressed concern on behalf of vulnerable patients, such as the elderly or those with mental  
36 health issues, who may lack the confidence or communication skills to push for an appointment  
37 when required.  
38  
39

#### 40 *Ease and convenience of access to care*

41 A strong theme in the analysis centred on how the introduction of the 'telephone-first' approach  
42 had affected the ease and convenience with which patients were able to access care. For some, the  
43 new mode of access had resulted in increased convenience, while for others the opposite had been  
44 the case. Commonly, the patients interviewed reported that they found that the approach enabled  
45 more convenient access to advice and care than the system previously in place, with benefits  
46 including: being able to get on with daily activities while waiting for a response from the practice,  
47 rather than having to wait for long periods in the surgery (facilitated by the availability of mobile  
48 telephone contact); reduced need to travel to the surgery unnecessarily (a particular benefit for  
49 those for whom travelling to the surgery was difficult, such as a mother with disabled children, a  
50 carer whose husband was disabled with chronic conditions and mobility issues, and those dependent  
51 on limited public transport services); and access to medication without the need for a face-to-face  
52 appointment:  
53  
54  
55  
56  
57  
58

59 *I like the fact that on a day like today, it is chucking it down, it's miserable,*  
60 *it's cold, if my mum had had to come to the doctor instead of a phone call on*

1  
2  
3 *any day where the weather was like this, it would have caused her a lot of*  
4 *pain. (102\_1031 – Female patient in her 40s, works part time, ongoing*  
5 *mental and physical health issues)*  
6

7  
8 In particular, patients able to accommodate time constraints of the approach (e.g. being at home  
9 during the day, retired or working flexibly) highlighted how the 'telephone-first' approach fitted  
10 conveniently with their daily schedules. Others, however, found the approach inconvenient in one or  
11 more respects, including: not being able to book appointments in advance; receiving a call from the  
12 GP at inconvenient times (when shopping, on public transport, or at work); or having to stay at home  
13 to wait for a call, particularly if it related to a personal issue that it was difficult to discuss in public:  
14

15  
16 *you can't sit glued to your phone all day waiting for a call, even if you've got*  
17 *a mobile phone, you might be in the shower, or you might be in a shop or on*  
18 *the other phone or something. So it doesn't work... and how people who are*  
19 *working, expect to get an appointment I don't know really. (110\_1007 –*  
20 *Female patient, early retirement due to ill health)*  
21

22  
23 Patients at several practices, described how such issues had been addressed by their practice by  
24 ensuring flexibility in the approach, such as by accommodating patient requests for a call-back at a  
25 particular time or offering limited advanced bookings for those unable to attend on the same day.  
26

27 Similarly, patients with particular difficulties that had an impact on how they were able to interact  
28 with the practice using the 'telephone-first' approach, described how such difficulties were  
29 overcome by minor adjustments and a flexible approach e.g. special arrangements for patients  
30 whose first language was not English, or those with a hearing impairment.  
31

### 32 33 34 *Differences in the nature of GP consultations: efficiency, communication and social contact* 35

36 Patients highlighted differences in the nature of GP consultations as a result of the new approach,  
37 not only identifying differences between telephone and face-to-face consultations, but also the  
38 impact of initial telephone contact on subsequent face-to-face appointments. Patients described  
39 both advantages and disadvantages of initially consulting by telephone rather than face-to-face,  
40 reflecting individual differences with respect to confidence and efficacy of communication by  
41 telephone and the value placed on face-to-face contact with a GP.  
42

43  
44 While some patients described feeling very comfortable communicating by telephone, including  
45 some patients with mental health issues who preferred telephone consultations because they felt  
46 more relaxed, others reported difficulties describing symptoms or understanding and recalling the  
47 GP's advice. Those patients reporting that they felt anxious when communicating on the telephone  
48 included older people, those with mental health issues, hearing impairment and one for whom  
49 English was not his first language. Others reported concerns on behalf of other patients:  
50

51  
52  
53 *I've got a friend, an old lady who's 88, going on 89, I think, and she*  
54 *absolutely hates [it]. She says "I can't talk on the phone, I just don't know*  
55 *what to say, I just go to pieces." And somebody like her, it's just totally awful*  
56 *you know, it's not satisfactory at all. (110\_1007 – Female patient in her 60s,*  
57 *early retirement due to ill health)*  
58  
59  
60

1  
2  
3 Some interviewees commented that they found the approach to be impersonal – rushed and to the  
4 point, an issue that was highlighted by patients with mental health concerns and chronic conditions  
5 in particular. This was in part attributed to a lack of relational continuity of care (see below) but also  
6 due to the nature of the telephone consultation itself, and the absence of the social cues present in  
7 face-to-face interaction. A patient with mental health issues described the negative impact of a lack  
8 of face-to-face contact on the nature of the consultation:  
9

10  
11 *I just cannot cope with not seeing someone's face [...] I just want to speak in*  
12 *a room with the door closed face-to-face with someone so that I can be*  
13 *honest about how I am feeling and what's been happening lately. So I don't*  
14 *really say much over the phone [...] whereas if it was face-to-face I would*  
15 *explain more (110\_1095 – Female patient in her 60s, part-time work,*  
16 *ongoing mental health issues)*  
17  
18

19 Changes in the nature of face-to-face appointments following the introduction of the 'telephone-  
20 first' approach, were also noted, including improvements such as reduced waiting time in surgery  
21 and a calmer more relaxed atmosphere, with patients experiencing less time-pressure during  
22 appointments. Some patients suggested that the approach led to GPs being better prepared and the  
23 appointment being more streamlined as a result. A few among those who did not observe any  
24 difference in the nature of face-to-face appointments, however, commented that having to repeat  
25 details given over the telephone in the face-to-face appointment was an annoyance and appeared  
26 inefficient.  
27  
28  
29

### 30 31 32 *Effects on continuity of care*

33 Given claims made by commercial providers that the 'telephone-first' approach can improve  
34 continuity of care for patients, interviewees were asked specifically about changes in the ease with  
35 which they were able to see a preferred GP. Again, there was variation between participants in their  
36 responses. Some patients reported finding it easier to see or speak to their preferred GP than with  
37 the previous system, as a result of the way in which calls were allocated within the practice, with  
38 patients being able to specify which GP they would like to call them back. If this was not possible,  
39 they could request a face-to-face appointment with the preferred GP during the telephone call.  
40 Others, however, reported the opposite, and found it harder to see their GP of choice, observing a  
41 trade-off between being seen or spoken to quickly and seeing their preferred GP. These  
42 observations highlighted differences between practices introducing the 'telephone-first' approach  
43 with respect to their capacity to preserve or enhance continuity of care.  
44  
45  
46  
47  
48

49 In addition, the degree to which the patients and carers interviewed were concerned about the  
50 impact of the introduction of the 'telephone-first' approach in this regard, varied between patients,  
51 according to the value they placed on their relationship with a particular GP. Concern was expressed  
52 about whether an unfamiliar GP could effectively assess an issue over the telephone and some  
53 patients worried about the lack of opportunity to develop or sustain a relationship with a GP (a  
54 particular concern among patients with chronic conditions and those with ongoing mental health  
55 issues):  
56  
57

58 *[an unknown] GP rang me back and I wasn't sure whether he knew anything*  
59 *about me. I'm quite sure he'd looked at my records very briefly but I was*  
60

1  
2  
3 *concerned because it's quite complicated and my preferred GP knows from*  
4 *day one and has worked with me and referred me and supported me, so I*  
5 *didn't know how much this person knew and I just was a little bit unsure and*  
6 *a little bit anxious about whether or not he knew enough about me*  
7 *(110\_1095 – Female in her 60s, part-time work, ongoing mental health*  
8 *issues)*  
9

### 10 11 12 13 *Implications for patient safety*

14 Patients speculated on the implications of the 'telephone-first' approach with respect to patient  
15 safety. Views on the impact (or potential impact) of the approach in this regard varied considerably  
16 between patients and across practices. While some patients felt vulnerable because of difficulties  
17 getting through to the practice by telephone or the fear that diagnoses might be missed in  
18 telephone consultations, others thought the approach was safer for patients, in part, because of the  
19 considerable reduction in waiting times for appointments:  
20  
21

22  
23 *Well I think you get to talk to your doctor when you need to talk to him or*  
24 *her, rather than having a long wait and perhaps getting progressively worse.*  
25 *Certainly if it's an acute condition, it can make a difference, can't it?*  
26 *(100\_1004 - Female patient in her early seventies, retired, multiple chronic*  
27 *health issues)*  
28

29  
30 *So I phoned up and it was early in the morning and I mentioned to the*  
31 *receptionist what the problem was, and so within minutes another doctor*  
32 *phoned back and he said you, had better come down. (117\_1029 - Female*  
33 *patient in her 60s with chronic health issues, not in employment, caring*  
34 *responsibilities)*  
35

36 Concerns were expressed among patients who were currently confident in their own communication  
37 skills that being less articulate or lacking the confidence to push for a face-to-face appointment  
38 when required may put some patients at risk of not receiving treatment they needed.  
39  
40

### 41 42 43 *Concerns regarding confidentiality*

44 Concerns regarding confidentiality associated with the 'telephone-first' approach marked a common  
45 theme in the analysis, as the system generally required the receptionist to ask the patient for brief  
46 details of their problem during the initial call to the practice:  
47  
48

49 *you know that whatever you say to a doctor is going to stay with the doctor,*  
50 *with the receptionist, you are never quite sure if it's going to stay there*  
51 *(117\_1066 - Single mother in her 30s, part-time work, infrequent user of GP)*  
52

53 Strong feelings were expressed on this subject, with, for example, one patient describing the  
54 approach as '*absolutely disgusting*' (103\_1042). Concern was even expressed by patients who  
55 acknowledged the benefit of providing the information in order for calls to be prioritized. Patients  
56 also reported concerns about confidentiality associated with the telephone consultation itself,  
57 especially if they had to receive the call back from the GP at a time and/or in a location where their  
58  
59  
60

1  
2  
3 conversation could be overheard, whether at home with family members present, in a work setting  
4 or on public transport.  
5  
6  
7

#### 8 *The importance of understanding the purpose of the approach and how it works*

9  
10 Patients described their understanding of the rationale for the introduction of the 'telephone-first'  
11 approach, how it was supposed to work in practice and how this had influenced their response to it.  
12 The degree to which patients reported that they had been consulted (or at least informed) ahead of  
13 the introduction of the new approach, varied considerably. Some patients highlighted their lack of  
14 awareness about how the approach would work in practice at the outset, and expressed irritation  
15 with a lack of consultation around its introduction, which had resulted in confusion, anxiety and  
16 misconceptions regarding the purpose behind the introduction of the approach. Others, however,  
17 commented that their initial misgivings had not, by and large, been realized.  
18  
19

20 Patients indicating their awareness that the approach involved the prioritization of calls according to  
21 need, acknowledged the necessity of waiting for a call-back accordingly:  
22  
23

24 *I mean sometimes if he's [the GP] really busy, you don't hear from him for a*  
25 *couple of hours but then he's obviously got patients there that are a priority.*  
26 *They know how to prioritize them which is good. (102\_1014 – Female*  
27 *patient, in her late 70s, retired, multiple chronic conditions)*  
28  
29

#### 30 31 *Assessing the overall acceptability of the approach*

32  
33 The advantages and disadvantages of the 'telephone-first' approach reported by patients varied  
34 between individuals and reflected both the way in which the 'telephone-first' approach had been  
35 implemented and the patients' own individual characteristics and resources. In assessing the overall  
36 acceptability of the approach, patients made reference to both these types of characteristic, and  
37 there was apparent interplay between them, with patients explaining how specific issues or  
38 disadvantages resulting from how the approach had been implemented were particularly  
39 problematic for them as an individual, as a result of personal characteristics or preferences, or the  
40 structure of their daily life. For example, having a long or unpredictable wait for a call back from a GP  
41 was an issue for patients unable to access a mobile phone or find a quiet, private place to take a call  
42 at work, but a lesser concern for those who were retired or were able to work flexibly. Examples of  
43 the kinds of factors considered by the patients interviewed as they assessed the overall acceptability  
44 of the 'telephone-first' approach are presented in tables 2 and 3.  
45  
46  
47  
48

49 The value attributed to particular advantages and disadvantages varied significantly, even between  
50 patients from the same practice or with similar characteristics. A disadvantage that represented a  
51 mild annoyance for one patient could render the approach completely unacceptable for another. For  
52 example, one patient experiencing mental health issues described the effect of having to wait a long  
53 time for a call back from a GP whilst in a distressed state, and how this had influenced her decision  
54 to leave the practice:  
55  
56

57 *I was really low and so I think I had to wait a few hours [for a call from the*  
58 *GP] and all that time I was in tears and it still took a couple of hours for the*  
59 *doctor. I thought, "Well, now I can't be bloody bothered." (103\_1042 –*  
60

Female patient in her 50s, not in employment, mental and chronic physical health problems)

In addition, interviewees also acknowledged that some issues such as difficulty with getting through to the practice initially, or long waits for a response from the practice were (or had the potential to be) of greater concern in some instances than in others, dependent on the perceived urgency of the issue for which they were seeking care.

In describing their assessment of the overall acceptability of the approach, some patients recounted long lists of annoyances (difficulty getting through on the telephone, confidentiality concerns when talking to receptionists, not being able to book in advance, not liking waiting for the call back) but still concluded that they preferred the new approach because they could speak to a doctor within hours and see them the same day if they needed to (an outcome on which they placed particular value).

| <b>System / practice characteristic</b>                   | <b>Factors influencing patients' assessment of the acceptability of the 'telephone-first' approach</b>                           |
|-----------------------------------------------------------|----------------------------------------------------------------------------------------------------------------------------------|
| <b>Capacity of the system to meet demand</b>              | Whether telephone calls to the practice are answered promptly                                                                    |
|                                                           | Whether there are sufficient appointment slots available for both telephone and face-to-face appointments                        |
| <b>Flexibility of the approach</b>                        | Whether advanced booking is available                                                                                            |
|                                                           | Degree to which there is flexibility in the timing offered for the GP to call back or ability to book the time of the call-back. |
|                                                           | Whether patients are required to describe their problem to the receptionist                                                      |
|                                                           | Whether adjustments have been made for patients who found difficulty with the approach                                           |
| <b>Capacity to preserve or enhance continuity of care</b> | Whether a choice of GP offered for telephone consultation and subsequent face-to-face appointment                                |
| <b>Extent of patient education / knowledge</b>            | Whether patients were consulted prior to introducing the approach                                                                |
|                                                           | Whether clear and updated instructions had been provided on how the system works                                                 |

Table 2. Practice/system characteristics that influenced patients' assessment of the acceptability of the 'telephone-first' approach

| <b>Patient characteristic or resource</b> | <b>Factors influencing patients' assessment of the acceptability of the 'telephone-first' approach</b> |
|-------------------------------------------|--------------------------------------------------------------------------------------------------------|
|-------------------------------------------|--------------------------------------------------------------------------------------------------------|



|                                                        |                                                                                                                                                |
|--------------------------------------------------------|------------------------------------------------------------------------------------------------------------------------------------------------|
| <b>Communication skills</b>                            | The degree to which they feel able to adequately communicate over the telephone                                                                |
| <b>Confidence</b>                                      | The degree to which they feel confident to request the outcome they want                                                                       |
| <b>Flexibility of daily schedule</b>                   | The degree to which they are able to accommodate time constraints of the approach e.g. being at home during the day/ retired/ working flexibly |
| <b>Access to mobile telephone</b>                      | Whether they are easily accessible on a mobile telephone                                                                                       |
| <b>Value placed on face-to-face contact with GP</b>    | The value they place on face-to-face contact compared to ease and speed of access to care                                                      |
| <b>Nature of relationship with GP or surgery</b>       | The value they place on a longstanding, trusting relationship with a GP                                                                        |
| <b>Nature of the reason for contacting the surgery</b> | Perceptions regarding the urgency of the issue for which they are seeking care                                                                 |

Table 3. Individual characteristics and resources that influenced patients' assessment of the acceptability of the 'telephone-first' approach

### Discussion

The study showed that, consistent with our published quantitative analysis of the patient and carer survey in our evaluation<sup>2</sup>, patients expressed a wide range of views, often strongly held, on the 'telephone-first' approach. Qualitative interviews allowed us to understand these views in greater depth and to explore some of the reasons behind the different views expressed. The new system clearly suited some patients, (e.g. by allowing them to avoid coming into the surgery) but was problematic for others (e.g. when it was difficult for someone working in an open plan office to take a call-back from the GP). Variation was evident within as well as between the different patient groups we recruited from and appeared to be influenced by the interplay of individual and practice level characteristics. Notably, a substantial proportion of negative comments were about the operation of the scheme itself rather than the principles behind it, for example, difficulty getting through on the telephone or being unable to schedule when the GP would call back. Some practices were able to operate the scheme in a way that met their patients' needs better than others and practices appeared to vary significantly in how they had implemented the approach, according to patients' accounts.

The National Health Service in England has prioritized improving access to care for several years and the 'telephone-first' approach is one attempt to address access problems, while at the same time trying to avoid an increase in practice workload. The finding in this study that the approach has been positively received by many of the patients interviewed, is supportive of previous research indicating that there is considerable potential for using telephone consultations in general practice<sup>5,10</sup>. Our findings also chime to a degree with previous findings suggesting that access is not the main driver

1  
2  
3 of patients' satisfaction with their GP practices – with interpersonal aspects of care and helpfulness  
4 of receptionists being more important,<sup>11,12</sup> (although our findings suggest that the value placed on  
5 the different aspects of care may vary considerably between patients, according to their individual  
6 needs and preferences).  
7

8  
9 The study highlights the need for clinicians and policymakers to take the needs of patients with  
10 varying care-seeking and interaction approaches into account when making major changes to the  
11 organization of general practice care. This change, while designed to improve access to care and  
12 reduce the workload burden on practices, clearly did not meet the needs of all patients and  
13 provoked outright hostility in some, particularly among those who struggled to access care at all as a  
14 result of issues with how the scheme had been implemented. Practices considering making this  
15 change should reflect on how they can make the scheme flexible for patients' needs, how they can  
16 make it easy for patients to get through on the telephone, and how they can use the approach to  
17 enhance both access and continuity of care, and recognize the need for continued development and  
18 adaptation of the approach.  
19

20  
21 A strength of the study is that the interviews included a wide range of patients and carers from a  
22 diverse group of practices, purposively sampled to capture a variety of views on the new approach.  
23 However, a limitation is the likelihood that practices operating the 'telephone-first' approach  
24 successfully were more likely to participate in the patient survey that provided patients who  
25 volunteered to be interviewed. We do not know how the views of patients participating in the study  
26 may compare with other patients, including those in practices that have not implemented the  
27 'telephone-first' approach.  
28

29  
30 Questions that could be addressed by future research are how to develop systems that are flexible  
31 enough to meet the needs of all their patients. While a rigid 'telephone-first' approach for all  
32 consultations does not do this, we observed practices that were modifying this approach (by for  
33 example allowing for some advanced booking of appointments) often on an ongoing basis, to meet  
34 the needs of patients as closely as they could. Successful approaches are likely to be different in  
35 different practices and more work could be done to identify what works best in different  
36 circumstances and to share learning.  
37  
38  
39  
40  
41  
42  
43

#### 44 Conclusions

45 The 'telephone-first' approach appears to work well for some patients but others find it much less  
46 acceptable. Some of the reported problems related to how the approach had been implemented  
47 rather than the 'telephone-first' approach in principle and suggests there may be potential for some  
48 of the challenges to be overcome. A range of factors were identified that should be considered by  
49 practices planning the approach in order to maximise its acceptability and best meet the needs of  
50 patients.  
51

52 *Word count: 5787 words + 346 words in tables*  
53

#### 54 Acknowledgements:

55  
56  
57 We would like to thank the patients and carers interviewed for this study and those who completed  
58 the questionnaires which provided the basis for participant recruitment. We are grateful to the GPs  
59  
60

1  
2  
3 and staff at practices taking part in the study for their support with its conduct. We would also like  
4 to thank the GPs, practice manager and patients on the study steering group who gave guidance on  
5 the design and conduct of the study and all those who attended and contributed to study learning  
6 events.  
7  
8  
9

10 Funding: The study was funded by the National Institute for Health Research (HS&DR Project  
11 13/59/40). Part of the funding was used to pay for data to be extracted from practice records by one  
12 of the commercial companies providing management support for the 'telephone-first' approach (GP  
13 Access). GP Access had no input into the analysis or interpretation of the data. The study was  
14 sponsored by Cambridgeshire and Peterborough Clinical Commissioning Group (CCG), who gave  
15 initial approval for the project.  
16  
17  
18

19 This article presents independent research funded by the National Institute for Health Research  
20 (NIHR). The views expressed are those of the author(s) and not necessarily those of the NHS, the  
21 NIHR or the Department of Health.  
22  
23  
24

25 Competing interests: All authors have completed the ICMJE uniform disclosure form at  
26 [www.icmje.org/coi\\_disclosure.pdf](http://www.icmje.org/coi_disclosure.pdf) and declare: no financial relationships with any organisations that  
27 might have an interest in the submitted work in the previous three years; no other relationships or  
28 activities that could appear to have influenced the submitted work.  
29  
30  
31

#### 32 Author statement:

33 All authors (SB, JN, JC, JE, EP and MR) contributed to the conception or design of the work and the  
34 interpretation of the findings. MR is PI for the study and had oversight, JN was project lead and SB  
35 was project manager. SB, JN, JC, JE were involved in data collection. SB, JN, JC, JE and EP conducted  
36 data analysis. All authors were involved in drafting and commenting on the paper and have  
37 approved the final version.  
38  
39

40 Ethical approval: The study was approved by the West of Scotland NHS Research Ethics Service (7th  
41 May 2015, REC reference 16/WS/0088).  
42  
43

#### 44 Data sharing:

45 No additional data are available.  
46  
47  
48  
49

---

#### 50 References

51  
52  
53 <sup>1</sup> Hobbs FD, Bankhead C, Mukhtar T, Stevens S, Perera-Salazar R, Holt T, et al. Clinical workload in UK  
54 primary care: a retrospective analysis of 100 million consultations in England, 2007-14. *Lancet*  
55 2016;387:2323-30. [https://doi.org/10.1016/s0140-6736\(16\)00620-6](https://doi.org/10.1016/s0140-6736(16)00620-6)

56  
57 <sup>2</sup> NHS England. High quality care now and for future generations: Transforming urgent and  
58 emergency care services in England. Page 35-36. [https://www.england.nhs.uk/wp-](https://www.england.nhs.uk/wp-content/uploads/2013/06/urg-emerg-care-ev-bse.pdf)  
59 [content/uploads/2013/06/urg-emerg-care-ev-bse.pdf](https://www.england.nhs.uk/wp-content/uploads/2013/06/urg-emerg-care-ev-bse.pdf)  
60

1  
2  
3  
4  
5  
6  
7  
8  
9  
10  
11  
12  
13  
14  
15  
16  
17  
18  
19  
20  
21  
22  
23  
24  
25  
26  
27  
28  
29  
30  
31  
32  
33  
34  
35  
36  
37  
38  
39  
40  
41  
42  
43  
44  
45  
46  
47  
48  
49  
50  
51  
52  
53  
54  
55  
56  
57  
58  
59  
60

---

<sup>3</sup> Newbould J, Abel G, Ball S, Corbett J, Elliott M, Exley J, Martin A, Saunders C, Wilson E, Winpenny E, Yang M, Roland M. Evaluation of telephone first approach to demand management in English general practice: observational study. *BMJ* 2017; 358: j4197  
[www.bmj.com/content/bmj/358/bmj.j4197.full.pdf](http://www.bmj.com/content/bmj/358/bmj.j4197.full.pdf)

<sup>4</sup> Hallam L. Access to general practice and general practitioners by telephone: the patient's view. *British Journal of General Practice* 1993; 43: 331-335.  
[www.ncbi.nlm.nih.gov/pmc/articles/PMC1372558/pdf/brjgenprac00041-0023.pdf](http://www.ncbi.nlm.nih.gov/pmc/articles/PMC1372558/pdf/brjgenprac00041-0023.pdf)

<sup>5</sup> McKinstry B, Watson P, Pinnock H, Heaney D, Sheikh A. Confidentiality and the telephone in family practice: a qualitative study of the views of patients, clinicians and administrative staff. *Family Practice* 2009; 26: 344-350 <https://academic.oup.com/fampra/article/26/5/344/635397>

<sup>6</sup> Brant, H, Atherton H, Ziebland S, McKinstry B, Campbell J, Salisbury C. Using alternatives to face-to-face consultations: a survey of prevalence and attitudes in general practice. *British Journal of General Practice* 2016; 66: e460-466. <https://www.ncbi.nlm.nih.gov/pmc/articles/PMC4917048/>

<sup>7</sup> Pereira Gray D, Wilkie P. Patient perspectives on the telephone first system. *BMJ* 2017; 359: j4925.  
<https://doi.org/10.1136/bmj.j4925>

<sup>8</sup> Boyatzis R. Transforming qualitative information: Thematic analysis and code development. Thousand Oaks, London, & New Delhi. 1998. SAGE Publications.

<sup>9</sup> O'Brien BC, Harris IB, Beckman TJ, Reed DA, Cook DA. Standards for reporting qualitative research: a synthesis of recommendations. *Acad Med.* 2014;89(9):1245-1251.

<sup>10</sup> Campbell J, Fletcher E, Britten N, Green C, Holt T, Lattimer V et al. Telephone triage for management of same-day consultation requests in general practice (the ESTEEM trial): a cluster-randomised controlled trial and cost-consequence analysis. *Lancet* 2014; 384: 1859-68.  
[https://www.thelancet.com/pdfs/journals/lancet/PIIS0140-6736\(14\)61058-8.pdf](https://www.thelancet.com/pdfs/journals/lancet/PIIS0140-6736(14)61058-8.pdf)

<sup>11</sup> Paddison CA, Abel GA, Roland MO, Elliott M, Lyratzopoulos G, Campbell J. Drivers of overall satisfaction with primary care: evidence from the English General Practice Patient Survey. *Health Expectations* 2013; 18: 1081–1092 <https://onlinelibrary.wiley.com/doi/abs/10.1111/hex.12081>

<sup>12</sup> Cowling T, Majeed A, Harris M. Importance of accessibility and opening hours to overall patient experience of general practice: analysis of repeated cross-sectional data from a national patient survey. *British Journal of General Practice* 2018; 18<sup>th</sup> June.  
<http://bjgp.org/content/early/2018/06/18/bjgp18X697673?ct=>

## Appendix 1. Patient interview guide

*This was a broad guide which was developed iteratively as early findings were reviewed by members of the research team*

### Introduction:

Please can you tell me a little bit about yourself, including whether you work

How long have you been at the practice?

How is your health in general? How regularly do you need access the GP?

### Process of booking an appointment:

How do you make an appointment with your GP?

Has this changed since you have been a patient at the practice? (What used to happen?)

Have you had to call the surgery on behalf of someone else / or has someone else called on your behalf? How did that work?

When you call the surgery, how long does it take to get through? Have you experienced any difficulty in getting through?

Do you have to provide any information to the reception staff concerning the call? [could prompt here for how comfortable they feel speaking to receptionist?]

If offered a call back do you get it within a reasonable time period? Do you get to specify when you would like the call back? Have you had any difficulties around the call back?

Is it always a doctor that calls you back? If you have a preferred doctor, do you get to speak to them? [prompt on continuity of care]

Have there been any changes in how the telephone consultations have been run since they were introduced? Has that improved the service/ made it more difficult for you?

### Your experience with telephone consultations:

How have you found the experience of using this system?

Is there anything about your lifestyle that makes it more or less difficult for you to use? [prompt: working hours, caring responsibilities etc]

What was the outcome of your last telephone consultation with the GP? (led to a face-to-face appointment, directed to another health-care professional such as nurse, or another service eg. Social services etc. or just given advice over the phone)

*If not offered a face-to face appointment with GP:*

Were you happy with this outcome? Do you feel the service was satisfactory? Did you seek care elsewhere instead? (e.g. at A&E)

1  
2  
3 *If offered a face-to-face appointment:*  
4

5 If you have a preferred doctor, did you get to see him/her?  
6

7 Have you noticed any change in the actual appointment [get more time with GP, GP better  
8 prepared etc]? Has the quality of the appointment changed?  
9

10 Have you had other telephone consultations where something different happened? What was the  
11 outcome? [repeat prompts as above]  
12  
13

#### 14 **How you feel about the system and what it means for you:**

15  
16 What do you like about the current system for making appointments? ([prompt on convenience,  
17 chance to speak to GP when don't want appointment – reassurance, practice seems more organised,  
18 get an appointment when want one, appointments not being booked by people for unsuitable use]  
19

20 What do you dislike about the current system for making appointments? [don't get an appointment  
21 when want one, can't communicate well using phone – lost personal connection, elderly – loss of  
22 social contact, safety concerns]  
23  
24

25 Is there anything you miss about the old system (e.g. being able to plan in advance)?  
26

27 How do you feel about talking to the doctor on the phone? [prompts: Do you feel comfortable talking  
28 about your medical condition /do you have any concerns over confidentiality? Do you feel that you  
29 are able to make yourself understood?]  
30  
31

32 How did you feel about the system when it was first introduced? Has this changed over time? [i.e.  
33 have they got used to the system]  
34

35 Has the telephone appointment system changed the way you seek health care services? [prompts:  
36 are they thinking about alternative services more before contacting GP? i.e. is this right for the GP  
37 should I be going to nurse or don't bother go straight to A&E?]  
38  
39

40 Has your contact with the GP surgery changed? (i.e. ring more often as know can speak to doctor  
41 etc). [prompt on whether offered an appointment, if not with GP who with? Just given advice over  
42 phone etc]  
43  
44

#### 45 **Concluding:**

46 If you had the choice would you go back the old system or keep the new system? Why would you  
47 make that choice?  
48

49 Do you think other patients share your view?  
50

51 Overall are you happy with the care you receive at the practice?  
52  
53

54 Is there anything else about the telephone appointment system that you'd like to discuss that we  
55 haven't spoken about?  
56  
57

58 Thank you for taking the time to meet with me today  
59  
60

## Appendix 2: Characteristics of participants and the 'telephone first' approach

1  
2  
3  
4  
5  
6  
7  
8  
9  
10  
11  
12  
13  
14  
15  
16  
17  
18  
19  
20  
21  
22  
23  
24  
25  
26  
27  
28  
29  
30  
31  
32  
33  
34  
35  
36  
37  
38  
39  
40  
41  
42  
43  
44  
45  
46

| Specific characteristics of the 'telephone first' approach (from patient perspective)                                                                                                                                                                                                                                                                                      | ID       | Age <sup>1</sup> | Gender <sup>1</sup> | Ethnicity <sup>1</sup> | Health status <sup>1</sup> | Employment status, nature of health concerns and frequency of GP use <sup>1,2</sup>                 | Approach preference <sup>2</sup> |
|----------------------------------------------------------------------------------------------------------------------------------------------------------------------------------------------------------------------------------------------------------------------------------------------------------------------------------------------------------------------------|----------|------------------|---------------------|------------------------|----------------------------|-----------------------------------------------------------------------------------------------------|----------------------------------|
| <b>Practice 100 (urban, list size 5,000-9,999)</b>                                                                                                                                                                                                                                                                                                                         | 100_1004 | 71               | Female              | white British          | fair                       | Retired; multiple chronic health issues; frequent user of GP                                        | 'Telephone first'                |
| <b>Notable features:</b> no advance booking of face-to face appointments; patient can specify time for call-back; nurse practitioner triages some requests; choice of GP offered for call-back and face-to-face appointment; duty GP takes phone calls in reception office                                                                                                 | 100_1006 | 79               | Male                | white British          | good                       | Retired; multiple chronic health issues, infrequent user of GP                                      | 'Telephone first'                |
| <b>Problems identified:</b> more difficult to see GP of choice on the day; can be difficult to get through to reception on Monday mornings                                                                                                                                                                                                                                 | 100_1064 | Adult            | Female              | white British          | fair                       | Carer for 85 year old mother with dementia; both have chronic health issues, frequent user of GP;   | 'Telephone first'                |
| <b>Previous system:</b> ring up to book in advance or queue up for same day appointments; same-day appointments often not available                                                                                                                                                                                                                                        | 100_1086 | 63               | Male                | white British          | good                       | Recently retired; infrequent user of GP                                                             | 'Telephone first'                |
| <b>Practice 101 (urban, list size 5,000-9,999)</b>                                                                                                                                                                                                                                                                                                                         | 101_1002 | 76               | Male                | white British          | very good                  | Retired; minor health issues requiring specialist input, infrequent user of GP; hearing impairment  | 'Telephone first'                |
| <b>Notable features:</b> possible to book telephone consultation in advance if preferred GP not available on the day; individual call back lists for each GP; prompt call-back or patient can specify time; some advance booking of face-to face appointments (for follow-ups or if patient unable to make same day appointment); nurse practitioner triages some requests | 101_1006 | 65               | Male                | white British          | very good                  | Full time carer for spouse; ongoing health issue requiring specialist input, infrequent user of GP  | 'Telephone first'                |
| <b>Problems identified:</b> can sometimes be difficult to get through to reception                                                                                                                                                                                                                                                                                         | 101_1024 | 50               | Female              | other black            | fair                       | Early retirement due to ill health; frequent user of GP                                             | 'Telephone first'                |
| <b>Previous system:</b> ring up to book in advance; waited 2-3 days for appointment or longer for preferred GP                                                                                                                                                                                                                                                             | 101_1086 | 37               | Male                | white British          | good                       | Works full time; ongoing mental and physical health issues; regular review by GP                    | 'Telephone first'                |
| <b>Practice 102 (urban, list size &lt;5,000)</b>                                                                                                                                                                                                                                                                                                                           | 102_1014 | 77               | Female              | white British          | fair                       | Retired; multiple chronic conditions; frequent user of GP                                           | 'Telephone first'                |
| <b>Notable features:</b> quick response from reception to incoming calls; wait for call-back depends on urgency of the issue; some advance booking of follow-up appointments; nurse does some telephone consulting; some forward booking by GPs, patient can always see GP face-to-face if they wish – practice considering making further modifications.                  | 102_1019 | 67               | Male                | white British          | poor                       | Retired; multiple chronic conditions; regular user of GP; seeing a specialist; lives alone          | Conventional                     |
|                                                                                                                                                                                                                                                                                                                                                                            | 102_1031 | 47               | Female              | white British          | poor                       | Works part time; ongoing mental and physical health issues; frequent user of GP; hearing impairment | 'Telephone first'                |
| <b>Problems identified:</b> can sometimes be difficult to get through to reception but this is variable                                                                                                                                                                                                                                                                    | 102_1064 | 65               | Female              | white British          | good                       | Retired; infrequent user of GP                                                                      | 'Telephone first'                |
| <b>Previous system:</b> ring up to book in advance; often waited 3-4 days for appointment but same day appointments available when required                                                                                                                                                                                                                                |          |                  |                     |                        |                            |                                                                                                     |                                  |

|    |                                                                                   |          |                    |        |         |           |                                                                                                    |                                              |
|----|-----------------------------------------------------------------------------------|----------|--------------------|--------|---------|-----------|----------------------------------------------------------------------------------------------------|----------------------------------------------|
| 1  | <b>Practice 103 (urban, list size 5,000-9,999)</b>                                | 103_1030 | 41                 | Female | white   | fair      | Mother of two disabled children; frequent user of GP often for advice by phone                     | 'Telephone first'                            |
| 2  | <b>Notable features:</b> receptionist asks patient whether issue is urgent – call | 103_1034 | 78                 | Male   | white   | fair      | Retired; very frequent user of GP                                                                  | 'Telephone first'                            |
| 3  | backs prioritised dependent on urgency of issue; flexibility in scheduling        | 103_1042 | 50                 | Female | white   | no        | Does not work; mental and chronic physical health problems; frequent user of GP                    | Conventional                                 |
| 4  | call back – patient can request a call back on another day if preferred GP is     | 103_1053 | 71                 | Female | white   | response  | Retired; frequent user of GP                                                                       | 'Telephone first'                            |
| 5  | not in; no advance booking of face-to-face appointments                           | 103_1074 | 67                 | Female | white   | good      | Retired; infrequent user of GP                                                                     | 'Telephone first', though with modifications |
| 6  | <b>Problems identified:</b> can be difficult to get through to reception – phone  |          |                    |        | British |           |                                                                                                    |                                              |
| 7  | line sometimes goes dead; face-to-face appointments not available if call         |          |                    |        | British |           |                                                                                                    |                                              |
| 8  | later in the day requiring patient to call again the following day                |          |                    |        |         |           |                                                                                                    |                                              |
| 9  | <b>Previous system:</b> walk-in system for on the day appointments or book by     |          |                    |        |         |           |                                                                                                    |                                              |
| 10 | phone – 2/3 days wait                                                             |          |                    |        |         |           |                                                                                                    |                                              |
| 11 |                                                                                   |          |                    |        |         |           |                                                                                                    |                                              |
| 12 |                                                                                   |          |                    |        |         |           |                                                                                                    |                                              |
| 13 |                                                                                   |          |                    |        |         |           |                                                                                                    |                                              |
| 14 | <b>Practice 104 (urban, list size &lt;5,000)</b>                                  | 104_1070 | 54                 | Female | white   | fair      | Does not work due to chronic health problems; infrequent user of GP as condition well controlled   | 'Telephone first'                            |
| 15 | <b>Notable features:</b> receptionist asks patient for a reason for the call -GP  | 104_1087 | 74                 | Female | white   | good      | Retired; increasing frequency of GP visits with age                                                | 'Telephone first'                            |
| 16 | reviews list of reasons given and offers face-to-face appointments to some        |          |                    |        | British |           |                                                                                                    |                                              |
| 17 | patients on basis of this information alone (without speaking to patient          |          |                    |        |         |           |                                                                                                    |                                              |
| 18 | directly); call-back within an hour by GP or by receptionist to call in for a     |          |                    |        |         |           |                                                                                                    |                                              |
| 19 | face-to-face appointment                                                          |          |                    |        |         |           |                                                                                                    |                                              |
| 20 | <b>Problems identified:</b> can be difficult to get through to reception on the   |          |                    |        |         |           |                                                                                                    |                                              |
| 21 | phone on a Monday                                                                 |          |                    |        |         |           |                                                                                                    |                                              |
| 22 | <b>Previous system:</b> walk-in system                                            |          |                    |        |         |           |                                                                                                    |                                              |
| 23 |                                                                                   |          |                    |        |         |           |                                                                                                    |                                              |
| 24 |                                                                                   |          |                    |        |         |           |                                                                                                    |                                              |
| 25 |                                                                                   |          |                    |        |         |           |                                                                                                    |                                              |
| 26 | <b>Practice 105 (urban, list size ≥ 10,000)</b>                                   | 105_1040 | 79                 | Female | white   | good      | Retired; chronic health issues; frequent user of GP; hearing impairment                            | 'Telephone first'                            |
| 27 | <b>Notable features:</b> call-back within 30 minutes for urgent issues (wait for  | 105_1043 | Adult <sup>3</sup> | Female | white   | n/a       | Does not work – mother of young child; chronic health issues (self and child); frequent user of GP | 'Telephone first'                            |
| 28 | call-back depends on urgency); cut off time for patients to call by in order      | 105_1090 | 78                 | Male   | white   | fair      | Retired; multiple chronic health issues; frequent user of GP                                       | 'Telephone first'                            |
| 29 | to receive same day call back (e.g. 16.30); nurse triage for some requests;       | 105_1099 | 78                 | Male   | white   | very good | Retired; fit and active; infrequent user of GP                                                     | 'Telephone first'                            |
| 30 | choice of GP offered for call-back and face-to-face appointment; reception        |          |                    |        | British |           |                                                                                                    |                                              |
| 31 | spread calls across all GPs, set number of calls per GP per day then a            |          |                    |        | British |           |                                                                                                    |                                              |
| 32 | pooled list.                                                                      |          |                    |        |         |           |                                                                                                    |                                              |
| 33 | <b>Problems identified:</b> can be difficult to get through to reception on the   |          |                    |        |         |           |                                                                                                    |                                              |
| 34 | phone; online booking no longer available                                         |          |                    |        |         |           |                                                                                                    |                                              |
| 35 | <b>Previous system:</b> booking in advance by phone – no difficulty getting an    |          |                    |        |         |           |                                                                                                    |                                              |
| 36 | appointment but up to three week wait for non-emergency appointment;              |          |                    |        |         |           |                                                                                                    |                                              |
| 37 | on line booking facility                                                          |          |                    |        |         |           |                                                                                                    |                                              |
| 38 |                                                                                   |          |                    |        |         |           |                                                                                                    |                                              |
| 39 |                                                                                   |          |                    |        |         |           |                                                                                                    |                                              |
| 40 |                                                                                   |          |                    |        |         |           |                                                                                                    |                                              |
| 41 |                                                                                   |          |                    |        |         |           |                                                                                                    |                                              |
| 42 |                                                                                   |          |                    |        |         |           |                                                                                                    |                                              |
| 43 |                                                                                   |          |                    |        |         |           |                                                                                                    |                                              |
| 44 |                                                                                   |          |                    |        |         |           |                                                                                                    |                                              |
| 45 |                                                                                   |          |                    |        |         |           |                                                                                                    |                                              |
| 46 |                                                                                   |          |                    |        |         |           |                                                                                                    |                                              |



|    |                                                                                   |          |    |        |             |      |                                                   |              |
|----|-----------------------------------------------------------------------------------|----------|----|--------|-------------|------|---------------------------------------------------|--------------|
| 1  | <b>Practice 106 (urban, list size ≥ 10,000)</b>                                   | 106_1013 | 53 | Female | white       | nr   | Works flexibly from home; chronic health issue;   | Conventional |
| 2  | <b>Notable features:</b> variable wait for call-back (from almost instant to many |          |    |        | British     |      | anxiety; frequent user of GP; previous missed     |              |
| 3  | hours); choice of GP offered for call-back and face-to-face appointment;          | 106_1025 | 78 | Female | white       | fair | cancer diagnosis                                  | 'Telephone   |
| 4  | some flexibility for GP to book appointment for next day but no advance           | 106_1026 | 45 | Female | British     | good | Retired; chronic health issue; frequent user of   | first'       |
| 5  | booking by reception (e.g. follow-up appointments); patients can choose           |          |    |        | white       |      | GP                                                | 'Telephone   |
| 6  | time for call back.                                                               | 106_1064 | 68 | Female | British     | fair | Not currently working due to ill health;          | first'       |
| 7  | <b>Problems identified:</b> can be difficult to get through to reception on the   | 106_1077 | 61 | Female | white       | fair | infrequent user of GP                             | 'Telephone   |
| 8  | phone on a Monday; can wait all day for a call back                               |          |    |        | British     |      | Retired; chronic health issues but infrequent     | first'       |
| 9  | <b>Previous system:</b> booking in advance by phone – was beginning to get        |          |    |        |             |      | user of GP                                        | 'Telephone   |
| 10 | more difficult to get an appointment                                              |          |    |        |             |      | Does not work; mental health and multiple         | first'       |
| 11 |                                                                                   |          |    |        |             |      | chronic physical health problems; frequent user   |              |
| 12 |                                                                                   |          |    |        |             |      | of GP                                             |              |
| 13 |                                                                                   |          |    |        |             |      |                                                   |              |
| 14 | <b>Practice 108 (urban, list size &lt;5,000)</b>                                  | 108_1032 | 59 | Female | white       | good | Works full time but easy to take calls or make    | 'Telephone   |
| 15 | <b>Notable features:</b> variable wait for call-back (from 30 minutes to many     |          |    |        | British     |      | appointments; chronic condition; carer for        | first'       |
| 16 | hours); duty GP takes calls all day, others only 8-11am; no advance               |          |    |        |             |      | elderly parents (with hearing impairment);        |              |
| 17 | bookings; recorded message indicates cut off time after which only                |          |    |        |             |      | frequent user of GP for self and as carer;        |              |
| 18 | emergency cases will receive a call back (e.g. 15.00)                             | 108_1090 | 66 | Female | white       | good | Retired; infrequent user of GP                    | Conventional |
| 19 | <b>Problems identified:</b> variable reports regarding difficulty getting through | 108_1099 | 28 | Female | British     | good | Student – some difficulty taking calls or making  | N/a (only    |
| 20 | on the phone; no longer offered choice of preferred GP; can wait all day          |          |    |        | Chinese     |      | appointments; speaks English as a second          | experienced  |
| 21 | for a call back; same-day call back not always available                          |          |    |        |             |      | language; unfamiliar with UK health system;       | this system) |
| 22 | <b>Previous system:</b> booking in advance by phone – was beginning to get        |          |    |        |             |      | frequent contact with GP                          |              |
| 23 | more difficult to get an appointment                                              |          |    |        |             |      |                                                   |              |
| 24 |                                                                                   |          |    |        |             |      |                                                   |              |
| 25 |                                                                                   |          |    |        |             |      |                                                   |              |
| 26 |                                                                                   |          |    |        |             |      |                                                   |              |
| 27 | <b>Practice 110 (urban, list size 5,000 – 9,999)</b>                              | 110_1007 | 60 | Female | white       | fair | Early retirement due to ill health; frequent user | Conventional |
| 28 | <b>Notable features:</b> phone lines shut off early in the day with recorded      |          |    |        | British     |      | of GP                                             |              |
| 29 | message to call the following day; no advance booking available; time of          | 110_1026 | 74 | Male   | white       | poor | Retired; multiple chronic conditions requiring    | Conventional |
| 30 | call-back not indicated; separate walk in system also reported to be in           |          |    |        | British     |      | specialist input; mental health issues; lives     |              |
| 31 | operation (bypassing phone system)                                                | 110_1095 | 63 | Female | white/black | fair | alone; reports limited user of GP due to          | Telephone    |
| 32 | <b>Problems identified:</b> extreme difficulty getting through on the phone; if   |          |    |        |             |      | Telephone                                         | Conventional |
| 33 | patient gets through appointments are often unavailable and patient is            |          |    |        |             |      | Part time/voluntary work; ongoing mental          |              |
| 34 | asked to call the following day; no longer offered choice of preferred GP;        |          |    |        |             |      | health issues; reports limited user of GP due to  |              |
| 35 | can wait all day for a call back;                                                 |          |    |        |             |      | Telephone                                         |              |
| 36 | <b>Previous system:</b> Advance booking system with long wait of a week or sit    |          |    |        |             |      |                                                   |              |
| 37 | and wait on the day. Previously had online system but scrapped.                   |          |    |        |             |      |                                                   |              |
| 38 |                                                                                   |          |    |        |             |      |                                                   |              |
| 39 |                                                                                   |          |    |        |             |      |                                                   |              |
| 40 |                                                                                   |          |    |        |             |      |                                                   |              |
| 41 |                                                                                   |          |    |        |             |      |                                                   |              |
| 42 |                                                                                   |          |    |        |             |      |                                                   |              |
| 43 |                                                                                   |          |    |        |             |      |                                                   |              |
| 44 |                                                                                   |          |    |        |             |      |                                                   |              |
| 45 |                                                                                   |          |    |        |             |      |                                                   |              |
| 46 |                                                                                   |          |    |        |             |      |                                                   |              |

|    |                                                                                  |          |                    |        |         |           |                                                                                                                    |                   |
|----|----------------------------------------------------------------------------------|----------|--------------------|--------|---------|-----------|--------------------------------------------------------------------------------------------------------------------|-------------------|
| 1  | <b>Practice 112 (urban, list size 5,000 – 9,999)</b>                             | 112_1015 | 65                 | Female | white   | good      | Retired; infrequent user of the GP                                                                                 | 'Telephone first' |
| 2  | <b>Notable features:</b> receptionist asks for brief details of issue – patient  | 112_1046 | Adult <sup>3</sup> | Male   | British | n/a       | Working parent; speaks English as a second language                                                                | 'Telephone first' |
| 3  | either put straight through to GP or receives very prompt call back; no          |          |                    |        |         |           |                                                                                                                    |                   |
| 4  | advance booking available; separate system for nurse appointments                |          |                    |        |         |           |                                                                                                                    |                   |
| 5  | <b>Problems identified:</b> difficulty getting through on the phone – might take |          |                    |        |         |           |                                                                                                                    |                   |
| 6  | up to an hour; if patient calls after 9 am call backs are often unavailable      |          |                    |        |         |           |                                                                                                                    |                   |
| 7  | and patient asked to call the following day; long wait in the surgery for        |          |                    |        |         |           |                                                                                                                    |                   |
| 8  | booked appointment                                                               |          |                    |        |         |           |                                                                                                                    |                   |
| 9  | <b>Previous system:</b> turn up at 8:00am and sit and wait on the day.           |          |                    |        |         |           |                                                                                                                    |                   |
| 10 |                                                                                  |          |                    |        |         |           |                                                                                                                    |                   |
| 11 |                                                                                  |          |                    |        |         |           |                                                                                                                    |                   |
| 12 | <b>Practice 114 (urban, list size 5,000 – 9,999)</b>                             | 114_1008 | 48                 | Male   | white   | good      | Works/easy to take calls or make appointments; chronic health issues; frequent user of GP                          | 'Telephone first' |
| 13 | <b>Notable features:</b> receptionist does not ask about the nature of the issue | 114_1029 | Adult <sup>3</sup> | Female | white   | n/a       | Carer for elderly father; works from home; frequent user of GP for self and as carer                               | 'Telephone first' |
| 14 | (change from original system); receptionist provides indication of time for      | 114_1058 | 72                 | Female | British | poor      | Retired; chronic health issues; frequent user of GP                                                                | Conventional      |
| 15 | call-back and can schedule flexibly around patient's requirements; advance       |          |                    |        | white   |           |                                                                                                                    |                   |
| 16 | booking available for some follow-up appointments; nurse practitioner            |          |                    |        | British |           |                                                                                                                    |                   |
| 17 | does some telephone consulting                                                   |          |                    |        |         |           |                                                                                                                    |                   |
| 18 | <b>Problems identified:</b> system functioning well                              |          |                    |        |         |           |                                                                                                                    |                   |
| 19 | <b>Previous system:</b> ring to book face-to-face appointment same day           |          |                    |        |         |           |                                                                                                                    |                   |
| 20 | appointments were always available if required.                                  |          |                    |        |         |           |                                                                                                                    |                   |
| 21 |                                                                                  |          |                    |        |         |           |                                                                                                                    |                   |
| 22 |                                                                                  |          |                    |        |         |           |                                                                                                                    |                   |
| 23 |                                                                                  |          |                    |        |         |           |                                                                                                                    |                   |
| 24 | <b>Practice 117 (urban, list size 5,000 – 9,999)</b>                             | 117_1027 | 51                 | Female | white   | very good | Works/difficult to take calls; infrequent user of GP;                                                              | 'Telephone first' |
| 25 | <b>Notable features:</b> prompt call-back from GP (often within 10-15 minutes –  | 117_1029 | 60                 | Female | white   | poor      | Does not work due to ill health and caring responsibilities; multiple chronic conditions; very frequent user of GP | 'Telephone first' |
| 26 | maximum 1 hour 30 minutes); no advance booking of face-to-face                   |          |                    |        | British |           |                                                                                                                    |                   |
| 27 | appointments; if preferred GP is not available patient offered choice to         | 117_1066 | 32                 | Female | white   | good      | Single mother/part time voluntary work; infrequent user of GP                                                      | 'Telephone first' |
| 28 | speak to a different GP or ring back when available; call back only available    | 117_1073 | 86                 | Male   | white   | good      | Retired; recent hospital stay but previously in good health; infrequent user of GP                                 | 'Telephone first' |
| 29 | for emergencies after 16.00                                                      |          |                    |        | British |           |                                                                                                                    |                   |
| 30 | <b>Problems identified:</b> time cut off to ensure face-to-face appointment      |          |                    |        |         |           |                                                                                                                    |                   |
| 31 | available on the day is unclear;                                                 |          |                    |        |         |           |                                                                                                                    |                   |
| 32 | <b>Previous system:</b> same day appointment system - rang on the day and        |          |                    |        |         |           |                                                                                                                    |                   |
| 33 | had to see whoever was available that day or ring the next day. Sometimes        |          |                    |        |         |           |                                                                                                                    |                   |
| 34 | a long wait to see Dr of choice                                                  |          |                    |        |         |           |                                                                                                                    |                   |
| 35 |                                                                                  |          |                    |        |         |           |                                                                                                                    |                   |
| 36 |                                                                                  |          |                    |        |         |           |                                                                                                                    |                   |
| 37 |                                                                                  |          |                    |        |         |           |                                                                                                                    |                   |
| 38 |                                                                                  |          |                    |        |         |           |                                                                                                                    |                   |
| 39 |                                                                                  |          |                    |        |         |           |                                                                                                                    |                   |
| 40 |                                                                                  |          |                    |        |         |           |                                                                                                                    |                   |
| 41 |                                                                                  |          |                    |        |         |           |                                                                                                                    |                   |
| 42 |                                                                                  |          |                    |        |         |           |                                                                                                                    |                   |
| 43 |                                                                                  |          |                    |        |         |           |                                                                                                                    |                   |
| 44 |                                                                                  |          |                    |        |         |           |                                                                                                                    |                   |
| 45 |                                                                                  |          |                    |        |         |           |                                                                                                                    |                   |
| 46 |                                                                                  |          |                    |        |         |           |                                                                                                                    |                   |

## Standards for Reporting Qualitative Research (SRQR)

### Title and abstract

S1 Title Concise description of the nature and topic of the study Identifying the study as qualitative or indicating the approach (e.g., ethnography, grounded theory) or data collection methods (e.g., interview, focus group) is recommended

*The nature / topic of the study is included.*

S2 Abstract Summary of key elements of the study using the abstract format of the intended publication; typically includes background, purpose, methods, results, and conclusions

*These are all included in the abstract.*

### Introduction

S3 Problem formulation Description and significance of the problem/phenomenon studied; review of relevant theory and empirical work; problem statement

*The nature and significance of the problem is described along with a review of empirical work.*

S4 Purpose or research question Purpose of the study and specific objectives or questions

*The objectives of the study are stated in the last sentence of the introduction.*

### Methods

S5 Qualitative approach and research paradigm Qualitative approach (e.g., ethnography, grounded theory, case study, phenomenology, narrative research) and guiding theory if appropriate; identifying the research paradigm (e.g., postpositivist, constructivist/ interpretivist) is also recommended; rationale (The rationale should briefly discuss the justification for choosing that theory, approach, method, or technique rather than other options available, the assumptions and limitations implicit in those choices, and how those choices influence study conclusions and transferability. As appropriate, the rationale for several items might be discussed together).

*See response S6 below*

S6 Researcher characteristics and reflexivity Researchers' characteristics that may influence the research, including personal attributes, qualifications/experience, relationship with participants, assumptions, and/or presuppositions; potential or actual interaction between researchers' characteristics and the research questions, approach, methods, results, and/or transferability

*The approach was principally narrative led by a flexible interview guide which is reproduced in appendix 1. However, as we outline in the paper, the topic guide was developed iteratively, both allowing flexibility within the interview for patients to express their own concerns and to introduce elements which had arisen from preliminary analysis of earlier interviews.*

S7 Context Setting/site and salient contextual factors; rationale

*These are described in the methods and results.*

1  
2  
3 S8 Sampling strategy How and why research participants, documents, or events were selected;  
4 criteria for deciding when no further sampling was necessary (e.g., sampling saturation); rationale  
5

6 *The sampling method is described in the method section, including possible biases that may have*  
7 *been introduced by the method of selecting practices.*  
8

9 S9 Ethical issues pertaining to human subjects Documentation of approval by an appropriate ethics  
10 review board and participant consent, or explanation for lack thereof; other confidentiality and data  
11 security issues  
12

13 *This study was reviewed and given a favourable opinion by the West of Scotland Research Ethics*  
14 *Committee 5 (reference: 15/WS/0088).*  
15

16  
17 S10 Data collection methods Types of data collected; details of data collection procedures including  
18 (as appropriate) start and stop dates of data collection and analysis, iterative process, triangulation  
19 of sources/methods, and modification of procedures in response to evolving study findings;  
20 rationale  
21

22 *These are included in the method section*  
23

24 S11 Data collection instruments and technologies Description of instruments (e.g., interview guides,  
25 questionnaires) and devices (e.g., audio recorders) used for data collection; if/how the instrument(s)  
26 changed over the course of the study  
27

28 *These are described in the methods section*  
29

30  
31 S12 Units of study Number and relevant characteristics of participants, documents, or events  
32 included in the study; level of participation  
33

34 *These are described in the results with further detail provided in a supplementary file*  
35

36  
37 S13 Data processing Methods for processing data prior to and during analysis, including  
38 transcription, data entry, data management and security, verification of data integrity, data coding,  
39 and anonymization/deidentification of excerpts  
40

41 *These are described in the methods section*  
42

43 S14 Data analysis Process by which inferences, themes, etc., were identified and developed,  
44 including the researchers involved in data analysis; usually references a specific paradigm or  
45 approach; rationale  
46

47 *This is described in the method section, including the iterative development of the interview guide*  
48 *and the procedure for checking coding.*  
49

50  
51 S15 Techniques to enhance trustworthiness Techniques to enhance trustworthiness and credibility  
52 of data analysis (e.g., member checking, audit trail, triangulation); rationale  
53

54 *This is described in the method section (multiple coding, regular discussion of emerging findings in*  
55 *the research team).*  
56

#### Results/findings

S16 Synthesis and interpretation Main findings (e.g., interpretations, inferences, and themes); might include development of a theory or model, or integration with prior research or theory

*The results section includes both the main findings and a synthesis of factors affecting the acceptability of the telephone-first approach.*

S17 Links to empirical data Evidence (e.g., quotes, field notes, text excerpts, photographs) to substantiate analytic findings

*The results section contains quotations from patient and carer interviews to substantiate the findings*

#### Discussion

S18 Integration with prior work, implications, transferability, and contribution(s) to the field. Short summary of main findings; explanation of how findings and conclusions connect to, support, elaborate on, or challenge conclusions of earlier scholarship; discussion of scope of application/generalizability; identification of unique contribution(s) to scholarship in a discipline or field

*These are included in the discussion.*

S19 Limitations Trustworthiness and limitations of findings

*These are included in the discussion and also in the bullets which follow the abstract.*

S20 Conflicts of interest Potential sources of influence or perceived influence on study conduct and conclusions; how these were managed

*A conflict of interest statement has been completed by all authors.*

S21 Funding Sources of funding and other support; role of funders in data collection, interpretation, and reporting

*The source of funding and the role of funders is included.*
