# Supplementary material for: Qualitative study of patient views on a ‘telephone-first’ approach in general practice in England: speaking to the GP by telephone before making face-to-face appointments
Source: PubMed Central journal article supplement (PMC6318515; doi:10.1136/bmjopen-2018-026197), 2018-12-31
Supplement: bmjopen-2018-026197supp002.pdf [file bmjopen-2018-026197supp002.pdf]

## Appendix 2: Characteristics of participants and the 'telephone first' approach

| Specific characteristics of the 'telephone first' approach (from patient perspective)                                                                                                                                                                                                                                                                                      | ID       | Age <sup>1</sup>   | Gender <sup>1</sup> | Ethnicity <sup>1</sup> | Health status <sup>1</sup> | Employment status, nature of health concerns and frequency of GP use <sup>1,2</sup>                 | Approach preference <sup>2</sup> |
|----------------------------------------------------------------------------------------------------------------------------------------------------------------------------------------------------------------------------------------------------------------------------------------------------------------------------------------------------------------------------|----------|--------------------|---------------------|------------------------|----------------------------|-----------------------------------------------------------------------------------------------------|----------------------------------|
| <b>Practice 100 (urban, list size 5,000-9,999)</b>                                                                                                                                                                                                                                                                                                                         | 100_1004 | 71                 | Female              | white British          | fair                       | Retired; multiple chronic health issues; frequent user of GP                                        | 'Telephone first'                |
| <b>Notable features:</b> no advance booking of face-to face appointments; patient can specify time for call-back; nurse practitioner triages some requests; choice of GP offered for call-back and face-to-face appointment; duty GP takes phone calls in reception office                                                                                                 | 100_1006 | 79                 | Male                | white British          | good                       | Retired; multiple chronic health issues, infrequent user of GP                                      | 'Telephone first'                |
| <b>Problems identified:</b> more difficult to see GP of choice on the day; can be difficult to get through to reception on Monday mornings                                                                                                                                                                                                                                 | 100_1064 | Adult <sup>3</sup> | Female              | white British          | fair                       | Carer for 85 year old mother with dementia; both have chronic health issues, frequent user of GP;   | 'Telephone first'                |
| <b>Previous system:</b> ring up to book in advance or queue up for same day appointments; same-day appointments often not available                                                                                                                                                                                                                                        | 100_1086 | 63                 | Male                | white British          | good                       | Recently retired; infrequent user of GP                                                             | 'Telephone first'                |
| <b>Practice 101 (urban, list size 5,000-9,999)</b>                                                                                                                                                                                                                                                                                                                         | 101_1002 | 76                 | Male                | white British          | very good                  | Retired; minor health issues requiring specialist input, infrequent user of GP; hearing impairment  | 'Telephone first'                |
| <b>Notable features:</b> possible to book telephone consultation in advance if preferred GP not available on the day; individual call back lists for each GP; prompt call-back or patient can specify time; some advance booking of face-to face appointments (for follow-ups or if patient unable to make same day appointment); nurse practitioner triages some requests | 101_1006 | 65                 | Male                | white British          | very good                  | Full time carer for spouse; ongoing health issue requiring specialist input, infrequent user of GP  | 'Telephone first'                |
| <b>Problems identified:</b> can sometimes be difficult to get through to reception                                                                                                                                                                                                                                                                                         | 101_1024 | 50                 | Female              | other black            | fair                       | Early retirement due to ill health; frequent user of GP                                             | 'Telephone first'                |
| <b>Previous system:</b> ring up to book in advance; waited 2-3 days for appointment or longer for preferred GP                                                                                                                                                                                                                                                             | 101_1086 | 37                 | Male                | white British          | good                       | Works full time; ongoing mental and physical health issues; regular review by GP                    | 'Telephone first'                |
| <b>Practice 102 (urban, list size &lt;5,000)</b>                                                                                                                                                                                                                                                                                                                           | 102_1014 | 77                 | Female              | white British          | fair                       | Retired; multiple chronic conditions; frequent user of GP                                           | 'Telephone first'                |
| <b>Notable features:</b> quick response from reception to incoming calls; wait for call-back depends on urgency of the issue; some advance booking of follow-up appointments; nurse does some telephone consulting; some forward booking by GPs, patient can always see GP face-to-face if they wish – practice considering making further modifications.                  | 102_1019 | 67                 | Male                | white British          | poor                       | Retired; multiple chronic conditions; regular user of GP; seeing a specialist; lives alone          | Conventional                     |
| <b>Problems identified:</b> can sometimes be difficult to get through to reception but this is variable                                                                                                                                                                                                                                                                    | 102_1031 | 47                 | Female              | white British          | poor                       | Works part time; ongoing mental and physical health issues; frequent user of GP; hearing impairment | 'Telephone first'                |
| <b>Previous system:</b> ring up to book in advance; often waited 3-4 days for appointment but same day appointments available when required                                                                                                                                                                                                                                | 102_1064 | 65                 | Female              | white British          | good                       | Retired; infrequent user of GP                                                                      | 'Telephone first'                |

|                                                                                                                                                                                                                                                                                                                                                                                                          |          |                    |        |               |             |                                                                                                    |                                              |
|----------------------------------------------------------------------------------------------------------------------------------------------------------------------------------------------------------------------------------------------------------------------------------------------------------------------------------------------------------------------------------------------------------|----------|--------------------|--------|---------------|-------------|----------------------------------------------------------------------------------------------------|----------------------------------------------|
| <b>Practice 103 (urban, list size 5,000-9,999)</b>                                                                                                                                                                                                                                                                                                                                                       | 103_1030 | 41                 | Female | white British | fair        | Mother of two disabled children; frequent user of GP often for advice by phone                     | 'Telephone first'                            |
| <b>Notable features:</b> receptionist asks patient whether issue is urgent – call backs prioritised dependent on urgency of issue; flexibility in scheduling call back – patient can request a call back on another day if preferred GP is not in; no advance booking of face-to-face appointments                                                                                                       | 103_1034 | 78                 | Male   | white British | fair        | Retired; very frequent user of GP                                                                  | 'Telephone first'                            |
|                                                                                                                                                                                                                                                                                                                                                                                                          | 103_1042 | 50                 | Female | white British | no response | Does not work; mental and chronic physical health problems; frequent user of GP                    | Conventional                                 |
| <b>Problems identified:</b> can be difficult to get through to reception – phone line sometimes goes dead; face-to-face appointments not available if call later in the day requiring patient to call again the following day                                                                                                                                                                            | 103_1053 | 71                 | Female | white British | good        | Retired; frequent user of GP                                                                       | 'Telephone first'                            |
|                                                                                                                                                                                                                                                                                                                                                                                                          | 103_1074 | 67                 | Female | white British | fair        | Retired; infrequent user of GP                                                                     | 'Telephone first', though with modifications |
| <b>Previous system:</b> walk-in system for on the day appointments or book by phone – 2/3 days wait                                                                                                                                                                                                                                                                                                      |          |                    |        |               |             |                                                                                                    |                                              |
| <b>Practice 104 (urban, list size &lt;5,000)</b>                                                                                                                                                                                                                                                                                                                                                         | 104_1070 | 54                 | Female | white British | fair        | Does not work due to chronic health problems; infrequent user of GP as condition well controlled   | 'Telephone first'                            |
| <b>Notable features:</b> receptionist asks patient for a reason for the call -GP reviews list of reasons given and offers face-to-face appointments to some patients on basis of this information alone (without speaking to patient directly); call-back within an hour by GP or by receptionist to call in for a face-to-face appointment                                                              | 104_1087 | 74                 | Female | white British | good        | Retired; increasing frequency of GP visits with age                                                | 'Telephone first'                            |
|                                                                                                                                                                                                                                                                                                                                                                                                          |          |                    |        |               |             |                                                                                                    |                                              |
| <b>Problems identified:</b> can be difficult to get through to reception on the phone on a Monday                                                                                                                                                                                                                                                                                                        |          |                    |        |               |             |                                                                                                    |                                              |
| <b>Previous system:</b> walk-in system                                                                                                                                                                                                                                                                                                                                                                   |          |                    |        |               |             |                                                                                                    |                                              |
| <b>Practice 105 (urban, list size ≥ 10,000)</b>                                                                                                                                                                                                                                                                                                                                                          | 105_1040 | 79                 | Female | white British | good        | Retired; chronic health issues; frequent user of GP; hearing impairment                            | 'Telephone first'                            |
| <b>Notable features:</b> call-back within 30 minutes for urgent issues (wait for call-back depends on urgency); cut off time for patients to call by in order to receive same day call back (e.g. 16.30); nurse triage for some requests; choice of GP offered for call-back and face-to-face appointment; reception spread calls across all GPs, set number of calls per GP per day then a pooled list. | 105_1043 | Adult <sup>3</sup> | Female | white British | n/a         | Does not work – mother of young child; chronic health issues (self and child); frequent user of GP | 'Telephone first'                            |
|                                                                                                                                                                                                                                                                                                                                                                                                          | 105_1090 | 78                 | Male   | white British | fair        | Retired; multiple chronic health issues; frequent user of GP                                       | 'Telephone first'                            |
| <b>Problems identified:</b> can be difficult to get through to reception on the phone; online booking no longer available                                                                                                                                                                                                                                                                                | 105_1099 | 78                 | Male   | white British | very good   | Retired; fit and active; infrequent user of GP                                                     | 'Telephone first'                            |
|                                                                                                                                                                                                                                                                                                                                                                                                          |          |                    |        |               |             |                                                                                                    |                                              |
| <b>Previous system:</b> booking in advance by phone – no difficulty getting an appointment but up to three week wait for non-emergency appointment; on line booking facility                                                                                                                                                                                                                             |          |                    |        |               |             |                                                                                                    |                                              |

|                                                                                                                                                                                                                                                                                                                                                                                                                                                                                                                                                                                                                                                                                                                                                                      |          |    |        |                  |      |                                                                                                                                                                                 |                                    |
|----------------------------------------------------------------------------------------------------------------------------------------------------------------------------------------------------------------------------------------------------------------------------------------------------------------------------------------------------------------------------------------------------------------------------------------------------------------------------------------------------------------------------------------------------------------------------------------------------------------------------------------------------------------------------------------------------------------------------------------------------------------------|----------|----|--------|------------------|------|---------------------------------------------------------------------------------------------------------------------------------------------------------------------------------|------------------------------------|
| <p><b>Practice 106 (urban, list size ≥ 10,000)</b></p> <p><b>Notable features:</b> variable wait for call-back (from almost instant to many hours); choice of GP offered for call-back and face-to-face appointment; some flexibility for GP to book appointment for next day but no advance booking by reception (e.g. follow-up appointments); patients can choose time for call back.</p> <p><b>Problems identified:</b> can be difficult to get through to reception on the phone on a Monday; can wait all day for a call back</p> <p><b>Previous system:</b> booking in advance by phone – was beginning to get more difficult to get an appointment</p>                                                                                                       | 106_1013 | 53 | Female | white<br>British | nr   | Works flexibly from home; chronic health issue; anxiety; frequent user of GP; previous missed cancer diagnosis                                                                  | Conventional                       |
|                                                                                                                                                                                                                                                                                                                                                                                                                                                                                                                                                                                                                                                                                                                                                                      | 106_1025 | 78 | Female | white<br>British | fair | Retired; chronic health issue; frequent user of GP                                                                                                                              | 'Telephone first'                  |
|                                                                                                                                                                                                                                                                                                                                                                                                                                                                                                                                                                                                                                                                                                                                                                      | 106_1026 | 45 | Female | white<br>British | good | Not currently working due to ill health; infrequent user of GP                                                                                                                  | 'Telephone first'                  |
|                                                                                                                                                                                                                                                                                                                                                                                                                                                                                                                                                                                                                                                                                                                                                                      | 106_1064 | 68 | Female | white<br>British | fair | Retired; chronic health issues but infrequent user of GP                                                                                                                        | 'Telephone first'                  |
|                                                                                                                                                                                                                                                                                                                                                                                                                                                                                                                                                                                                                                                                                                                                                                      | 106_1077 | 61 | Female | white<br>British | fair | Does not work; mental health and multiple chronic physical health problems; frequent user of GP                                                                                 | 'Telephone first'                  |
| <p><b>Practice 108 (urban, list size &lt;5,000)</b></p> <p><b>Notable features:</b> variable wait for call-back (from 30 minutes to many hours); duty GP takes calls all day, others only 8-11am; no advance bookings; recorded message indicates cut off time after which only emergency cases will receive a call back (e.g. 15.00)</p> <p><b>Problems identified:</b> variable reports regarding difficulty getting through on the phone; no longer offered choice of preferred GP; can wait all day for a call back; same-day call back not always available</p> <p><b>Previous system:</b> booking in advance by phone – was beginning to get more difficult to get an appointment</p>                                                                          | 108_1032 | 59 | Female | white<br>British | good | Works full time but easy to take calls or make appointments; chronic condition; carer for elderly parents (with hearing impairment); frequent user of GP for self and as carer; | 'Telephone first'                  |
|                                                                                                                                                                                                                                                                                                                                                                                                                                                                                                                                                                                                                                                                                                                                                                      | 108_1090 | 66 | Female | white<br>British | good | Retired; infrequent user of GP                                                                                                                                                  | Conventional                       |
|                                                                                                                                                                                                                                                                                                                                                                                                                                                                                                                                                                                                                                                                                                                                                                      | 108_1099 | 28 | Female | Chinese          | good | Student – some difficulty taking calls or making appointments; speaks English as a second language; unfamiliar with UK health system; frequent contact with GP                  | N/a (only experienced this system) |
| <p><b>Practice 110 (urban, list size 5,000 – 9,999)</b></p> <p><b>Notable features:</b> phone lines shut off early in the day with recorded message to call the following day; no advance booking available; time of call-back not indicated; separate walk in system also reported to be in operation (bypassing phone system)</p> <p><b>Problems identified:</b> extreme difficulty getting through on the phone; if patient gets through appointments are often unavailable and patient is asked to call the following day; no longer offered choice of preferred GP; can wait all day for a call back;</p> <p><b>Previous system:</b> Advance booking system with long wait of a week or sit and wait on the day. Previously had online system but scrapped.</p> | 110_1007 | 60 | Female | white<br>British | fair | Early retirement due to ill health; frequent user of GP                                                                                                                         | Conventional                       |
|                                                                                                                                                                                                                                                                                                                                                                                                                                                                                                                                                                                                                                                                                                                                                                      | 110_1026 | 74 | Male   | white<br>British | poor | Retired; multiple chronic conditions requiring specialist input; mental health issues; lives alone; reports limited user of GP due to Telephone                                 | Conventional                       |
|                                                                                                                                                                                                                                                                                                                                                                                                                                                                                                                                                                                                                                                                                                                                                                      | 110_1095 | 63 | Female | white/black      | fair | Part time/voluntary work; ongoing mental health issues; reports limited user of GP due to Telephone                                                                             | Conventional                       |

|                                                                                                                                                                                                                                                                                                                                              |          |                    |        |               |           |                                                                                                                    |                   |
|----------------------------------------------------------------------------------------------------------------------------------------------------------------------------------------------------------------------------------------------------------------------------------------------------------------------------------------------|----------|--------------------|--------|---------------|-----------|--------------------------------------------------------------------------------------------------------------------|-------------------|
| <b>Practice 112 (urban, list size 5,000 – 9,999)</b>                                                                                                                                                                                                                                                                                         | 112_1015 | 65                 | Female | white         | good      | Retired; infrequent user of the GP                                                                                 | 'Telephone first' |
| <b>Notable features:</b> receptionist asks for brief details of issue – patient either put straight through to GP or receives very prompt call back; no advance booking available; separate system for nurse appointments                                                                                                                    | 112_1046 | Adult <sup>3</sup> | Male   | British other | n/a       | Working parent; speaks English as a second language                                                                | 'Telephone first' |
| <b>Problems identified:</b> difficulty getting through on the phone – might take up to an hour; if patient calls after 9 am call backs are often unavailable and patient asked to call the following day; long wait in the surgery for booked appointment                                                                                    |          |                    |        |               |           |                                                                                                                    |                   |
| <b>Previous system:</b> turn up at 8:00am and sit and wait on the day.                                                                                                                                                                                                                                                                       |          |                    |        |               |           |                                                                                                                    |                   |
| <b>Practice 114 (urban, list size 5,000 – 9,999)</b>                                                                                                                                                                                                                                                                                         | 114_1008 | 48                 | Male   | white         | good      | Works/easy to take calls or make appointments; chronic health issues; frequent user of GP                          | 'Telephone first' |
| <b>Notable features:</b> receptionist does not ask about the nature of the issue (change from original system); receptionist provides indication of time for call-back and can schedule flexibly around patient's requirements; advance booking available for some follow-up appointments; nurse practitioner does some telephone consulting | 114_1029 | Adult <sup>3</sup> | Female | white         | n/a       | Carer for elderly father; works from home; frequent user of GP for self and as carer                               | 'Telephone first' |
| <b>Problems identified:</b> system functioning well                                                                                                                                                                                                                                                                                          | 114_1058 | 72                 | Female | British white | poor      | Retired; chronic health issues; frequent user of GP                                                                | Conventional      |
| <b>Previous system:</b> ring to book face-to-face appointment same day appointments were always available if required.                                                                                                                                                                                                                       |          |                    |        |               |           |                                                                                                                    |                   |
| <b>Practice 117 (urban, list size 5,000 – 9,999)</b>                                                                                                                                                                                                                                                                                         | 117_1027 | 51                 | Female | white         | very good | Works/difficult to take calls; infrequent user of GP;                                                              | 'Telephone first' |
| <b>Notable features:</b> prompt call-back from GP (often within 10-15 minutes – maximum 1 hour 30 minutes); no advance booking of face-to-face appointments; if preferred GP is not available patient offered choice to speak to a different GP or ring back when available; call back only available for emergencies after 16.00            | 117_1029 | 60                 | Female | white British | poor      | Does not work due to ill health and caring responsibilities; multiple chronic conditions; very frequent user of GP | 'Telephone first' |
|                                                                                                                                                                                                                                                                                                                                              | 117_1066 | 32                 | Female | white British | good      | Single mother/part time voluntary work; infrequent user of GP                                                      | 'Telephone first' |
| <b>Problems identified:</b> time cut off to ensure face-to-face appointment available on the day is unclear;                                                                                                                                                                                                                                 | 117_1073 | 86                 | Male   | white British | good      | Retired; recent hospital stay but previously in good health; infrequent user of GP                                 | 'Telephone first' |
| <b>Previous system:</b> same day appointment system - rang on the day and had to see whoever was available that day or ring the next day. Sometimes a long wait to see Dr of choice                                                                                                                                                          |          |                    |        |               |           |                                                                                                                    |                   |

<sup>1</sup>Based on patient survey

<sup>2</sup>Based on interview data

<sup>3</sup>Interviewee completed survey on behalf of another patient (age of interviewee not given)
